# Supplementary material for: The Transforming Growth Factor-β Pathway Is a Common Target of Drugs That Prevent Experimental Diabetic Retinopathy
Source: Oxford University Press journal article supplement (doi:10.2337/db08-1008), 2009-04-28
Supplement: db08-1008_online_appendix_.pdf [file db08-1008_online_appendix_.pdf]

**Supplemental Table 1: Primary antibodies used in immunoblotting**

| <b>Antigen</b>                    | <b>Antibody</b>        | <b>Source (catalog #)</b>           | <b>Dilution</b> |
|-----------------------------------|------------------------|-------------------------------------|-----------------|
| TGF $\beta$ R1                    | rabbit polyclonal V-22 | Santa Cruz Biotechnology (sc-398)   | 1:500           |
| COX-1                             | rabbit polyclonal      | Cayman Chemical (160109)            | 1:500           |
| NCoA3                             | goat polyclonal R-19   | Santa Cruz Biotechnology (sc-32348) | 1:200           |
| RasGAP                            | rabbit antiserum       | gift of Dr. A. Kazlauskas           | 1:10,000        |
| $\beta$ -actin                    | mouse monoclonal AC-15 | Sigma-Aldrich (A 5441)              | 1:10,000        |
| phosphorylated Smad2 (ser465/467) | rabbit polyclonal      | Cell Signaling Technology (3101)    | 1:1000          |
| Smad2/3                           | rabbit polyclonal      | Millipore (07-408)                  | 1:1000          |

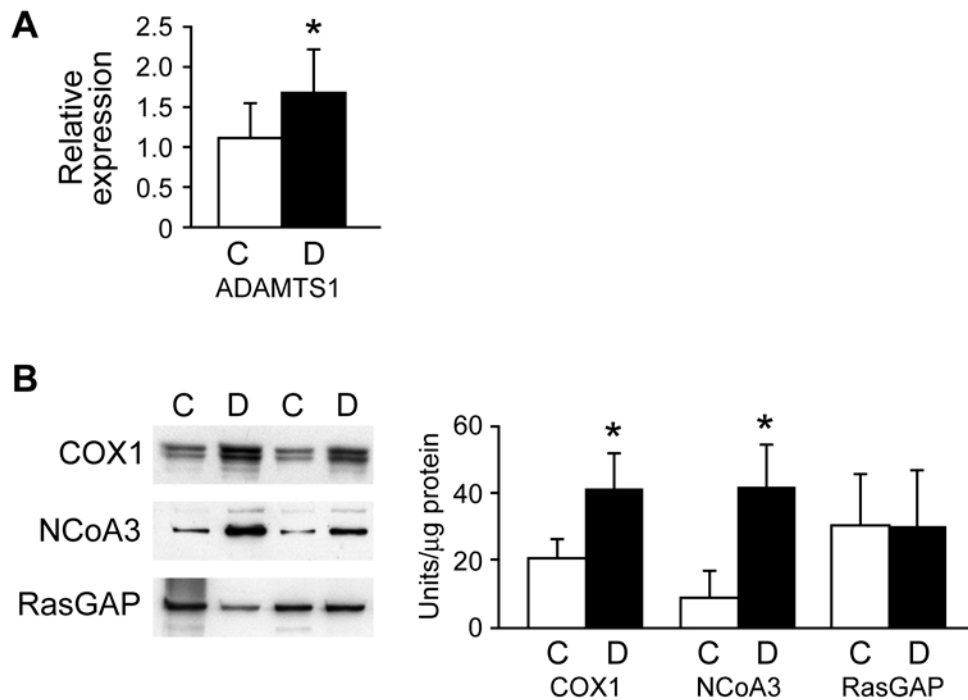

**Supplemental Figure 1. Confirmation of microarray results for selected genes.** Total RNA and protein lysates were prepared from retinal vessels isolated by hypotonic lysis from the retina of diabetic (D) and age-matched control (C) rats. **(A)** ADAMTS-1 mRNA levels assayed by quantitative real-time PCR. Relative expression was calculated by the comparative  $C_T$  method using  $\beta$ -actin as endogenous control. Values are mean  $\pm$  SD.  $n = 7$  rats per group. \*  $P = 0.05$ . **(B)** Representative Western blots of COX1 and NCoA3, and bar plot of the quantitative analysis. Immunoblotting for RasGAP served as control for loading. Values are mean  $\pm$  SD.  $n = 3-5$  rats per group. \*  $P < 0.02$ .

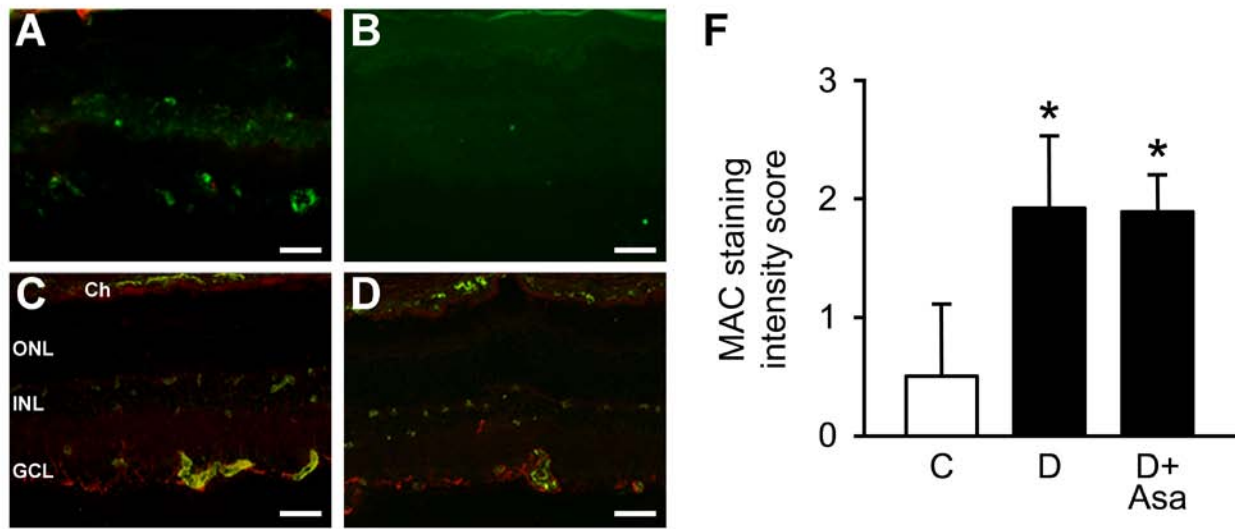

**Supplemental Figure 2. Aspirin treatment does not prevent complement activation in the retinal vessels of diabetic rats (3 months diabetes duration).** Complement activation was detected by immunostaining retinal sections for the membrane attack complex (MAC, C5b-9) of complement. The secondary antibody was Cy3-conjugated, yielding red fluorescence. Double-staining for vWf (FITC, green fluorescence) was used to identify the vessels. The intensity and frequency of MAC staining were scored by masked observers on a scale from 0 (no staining) to 4 (maximal staining) as previously described (10). **(A-C)** Representative photographs of retinal sections immunostained for MAC and vWf. **(A)** The retina of a control rat shows only vWf staining, MAC is not detected. **(B)** Negative control. **(C)** The retina of a diabetic rat shows colocalization of MAC and vWf, indicating deposition of MAC in the retinal vessels. **(D)** The retina of an aspirin-treated diabetic rat shows colocalization of MAC and vWf, as in untreated diabetes. ONL, outer nuclear layer; INL, inner nuclear layer; GCL, ganglion cell layer; Ch, choroid. Scale bar = 50 micron. **(F)** Bar plot of the quantitative analysis of MAC staining intensity; values are mean ± SD. C, control rats, n=5; D, diabetic rats, n=7; D+ASA, diabetic rats treated with aspirin, n=4. \*  $P < 0.003$  vs C.

**Supplemental Table 2:** Gene expression profile of retinal vessels in diabetes. Differentially expressed genes related to **TGF- $\beta$ /BM Ps pathway**.

| REA 230 20 Index                                 | Representative Public ID | Entrez Gene ID | Gene Title                                                   | Gene Symbol | DM vs C fold change | DM vs C posterior probability | Changes corrected by sorbinil | Changes corrected by aspirin | Summary notes (from Entrez Gene and literature)                                                                                                                                                                                                                                                                                                                                                                                                                                                                                                                                                                                                                                                                                                                               |
|--------------------------------------------------|--------------------------|----------------|--------------------------------------------------------------|-------------|---------------------|-------------------------------|-------------------------------|------------------------------|-------------------------------------------------------------------------------------------------------------------------------------------------------------------------------------------------------------------------------------------------------------------------------------------------------------------------------------------------------------------------------------------------------------------------------------------------------------------------------------------------------------------------------------------------------------------------------------------------------------------------------------------------------------------------------------------------------------------------------------------------------------------------------|
| <b>TGF-<math>\beta</math> PATHWAY ACTIVATION</b> |                          |                |                                                              |             |                     |                               |                               |                              |                                                                                                                                                                                                                                                                                                                                                                                                                                                                                                                                                                                                                                                                                                                                                                               |
| 1376636_at                                       | BE111972                 | 29591          | transforming growth factor, beta receptor 1                  | Tgfb1       | 2.06                | 0.99700                       | YES                           | YES                          | <b>ALK-5.</b> Receptor serine/threonine kinase. TGF- $\beta$ receptor complex. Both TGFBR1 and TGFBR2 are required for TGF- $\beta$ signaling. Upregulated in ischemia-reperfusion injury and atherosclerotic lesions. <b>Upregulated by glucose (mesangial cells, MDCK cells, VSMC) and in diabetes (kidney).</b>                                                                                                                                                                                                                                                                                                                                                                                                                                                            |
| 1368921_at                                       | NM_012924                | 25406          | CD44 antigen                                                 | Cd44        | 2.05                | 0.99900                       | NO                            | NO                           | Cell-surface glycoprotein. Receptor for hyaluronic acid (HA) and other ligands (osteopontin, collagens, MMPs). Multiple isoforms (alternative splicing). Cell-cell and cell-matrix interactions, cell adhesion and migration. Cytokines/growth factors presentation. Binding of HA to CD44 leads to NF- $\kappa$ B activation. Induced in inflammation by cytokines and growth factors (TNF $\alpha$ , IL-1 $\beta$ , TGF- $\beta$ , IFN, HGF, VEGF, and FGF). Upregulated in vascular injury. Pro-angiogenic. Interacts with TGF $\beta$ R1 = enhances TGF- $\beta$ signaling. Interacts with CD74.                                                                                                                                                                          |
| 1382189_at                                       | AI574779                 | 25615          | syndecan 2                                                   | Sdc2        | 2.09                | 0.99900                       | NO                            | YES                          | <b>Heparan sulfate proteoglycan 1.</b> Proteoglycan receptor of the ECM. Connection between ECM and actin cytoskeleton. Binds laminin, FN, growth factors, and a variety of other molecules. Highly expressed in brain vessels. Cell proliferation and migration. Interacts with FGF2, VEGF, and TGF- $\beta$ superfamily = growth factor presentation to the specific receptor and co-receptor. Upregulated by TNF- $\alpha$ (HUVEC), TGF- $\beta$ 1, and BMP-2. Syndecan-2 overexpression leads to upregulation of TGF- $\beta$ RI and RII. <b>Increased in diabetes (kidney) = regulates TGF-<math>\beta</math> activity.</b>                                                                                                                                              |
| 1396074_at                                       | BF525157                 | 25573          | ubiquitin-conjugating enzyme E2I                             | Ube2i       | 1.92                | 0.99302                       | YES                           | YES                          | <b>Ubc9.</b> Member of the E2 ubiquitin-conjugating enzyme family. Ube2i is the key enzyme of the sumoylation reaction. The Sumo pathway is a key regulator of numerous processes: transcriptional regulation, nuclear transport, maintenance of genome integrity, signal transduction. Sumoylation occurs in proteins involved in: cell-cycle regulation, proliferation, apoptosis and DNA repair. Regulation of cell growth (mitotic progression chromosome segregation, sister-chromatid regulation). Ubc9 and, by implication, the SUMO pathway, is critical for early embryonic development. Overexpressed in tumors. Interacts with FAS (also UP) and modulates FAS activity. Interacts with p53-p63 (also UP). Regulates Smad4 stability and transcriptional activity. |
| 1367631_at                                       | NM_022266                | 64032          | connective tissue growth factor                              | Ctgf        | 2.11                | 0.99200                       | YES                           | YES                          | Member of the CNN family of matricellular proteins initially discovered as a protein secreted by EC. Induced by TGF- $\beta$ is a downstream mediator of TGF- $\beta$ = fibrosis. Promotes EC proliferation, migration, adhesion, survival = pro-angiogenic. Binds BMPs (inhibition of BMP signaling) and TGF- $\beta$ 1 (activation of TGF- $\beta$ signaling). Upregulated in wound healing and fibrotic diseases. <b>Upregulated in diabetes (retina and kidney glomeruli) and by high glucose (mesangial cells) via TGF-<math>\beta</math>.</b>                                                                                                                                                                                                                           |
| 1367712_at                                       | NM_053819                | 116510         | tissue inhibitor of metalloproteinase 1                      | Timp1       | 4.01                | 1.00000                       | NO                            | NO                           | Inhibitor of MMPs. Promotes cell proliferation and may have an anti-apoptotic function. Upregulated by cytokines (IL-1 $\beta$ , TNF- $\alpha$ , IFN $\gamma$ , IL-6, TGF- $\beta$ ) and hormones. Induced by TGF- $\beta$ via CTGF. Inflammatory response. Anti-angiogenic. Upregulated in vascular injury = prevents neointima formation. <b>Upregulated in diabetes (glomeruli, retinal Müller cells) and by high glucose (via CTGF).</b>                                                                                                                                                                                                                                                                                                                                  |
| 1371310_s_at                                     | BI285495                 | 29345          | serine (or cysteine) proteinase inhibitor, clade H, member 1 | Serpinh1    | 2.49                | 1.00000                       | NO                            | NO                           | <b>HSP47, colligin.</b> Member of the serpin superfamily of serine proteinase inhibitors. Molecular chaperone involved in the maturation of collagen molecules. Upregulated by TGF- $\beta$ in rat skeletal myoblasts, mouse osteoblasts, and human embryonic lung fibroblast =fibrosis. Upregulated in atherosclerotic lesions (SMC) and in lesions of fibrotic diseases. Interacts with Cd9.                                                                                                                                                                                                                                                                                                                                                                                |
| 1368259_at                                       | NM_017043                | 24693          | prostaglandin-endoperoxide synthase 1                        | Ptgs1       | 2.04                | 0.99900                       | NO                            | YES                          | <b>Cyclooxygenase 1, COX-1.</b> Prostaglandin synthesis. Constitutive isoform. Inhibited by aspirin. Upregulated in EC in tissue injury (cirrhotic liver, traumatic brain injury) and by estrogen/progesterone. Upregulated by TGF- $\beta$ . <b>In diabetes: upregulated in kidney medulla, downregulated in aorta and sciatic nerve.</b>                                                                                                                                                                                                                                                                                                                                                                                                                                    |

The TGF- $\beta$  pathway is a common target of drugs that prevent experimental diabetic retinopathy

Supplemental Table 2

Page 1 of 2

| REA 230 20 Index               | Representative Public ID | Entrez Gene ID | Gene Title                                        | Gene Symbol      | DM vs C fold change | DM vs C posterior probability | Changes corrected by sorbinil | Changes corrected by aspirin | Summary notes (from Entrez Gene and literature)                                                                                                                                                                                                                                                                                                                                                                                                                                       |
|--------------------------------|--------------------------|----------------|---------------------------------------------------|------------------|---------------------|-------------------------------|-------------------------------|------------------------------|---------------------------------------------------------------------------------------------------------------------------------------------------------------------------------------------------------------------------------------------------------------------------------------------------------------------------------------------------------------------------------------------------------------------------------------------------------------------------------------|
| 1380638_at                     | BI294907                 | 84584          | nuclear receptor coactivator 3                    | Ncoa3            | 2.12                | 0.99232                       | YES                           | NO                           | <b>Steroid receptor coactivator 3 (SRC3), thyroid hormone receptor activator molecule 1 (TRAM-1), CBP-interacting protein.</b> Nuclear receptor coactivator. Interacts with nuclear-hormone receptors. Enhances NF- $\kappa$ B activity (interaction with IKK). Highly expressed in VSMC and EC. Induced by TGF- $\beta$ .                                                                                                                                                            |
| 1371131_a_at                   | U30789                   | 117514         | Thioredoxin interacting protein                   | Txnip            | 2.66                | 0.99899                       | YES                           | NO                           | <b>VDUP1.</b> Negative regulator of thioredoxin. Upregulation promotes oxidative stress. Pro-apoptotic. Upregulated by vitamin D3 and TGF- $\beta$ . <b>Upregulated by high glucose (glucose responsive elements in the promoter). Induced in diabetes (aorta, kidney, islets).</b>                                                                                                                                                                                                   |
| 1386913_at                     | NM_019358                | 54320          | podoplanin                                        | Pdpm             | 2.02                | 0.99600                       | YES                           | NO                           | Mucin-type small membrane glycoprotein. Expressed in lymphatic EC, podocytes, alveolar type I cells, and epithelial cells. Induced in HUVEC and microvascular EC by IFN $\gamma$ , IL-3, TNF- $\alpha$ . Induced by TGF- $\beta$ (tumor cells). Lymphatic development. Promotes cell adhesion, migration, and tube formation. Ectopic expression = actin reorganization and cell motility.                                                                                            |
| 1389617_at                     | BM392135                 | 362871         | ELK3, member of ETS oncogene family (predicted)   | Elk3_predicted   | 2.00                | 0.99027                       | NO                            | NO                           | Transcription factor member of the ETS-domain transcription factor family and the ternary complex factor (TCF) subfamily. Proteins in this subfamily regulate transcription when recruited by serum response factor to bind to serum response elements. Activated by signal-induced phosphorylation; transcriptional inhibitor in the absence of Ras, but activates transcription when Ras is present. Repressor of NOS2 and HO1; upregulated by TGF- $\beta$ 1; downregulated by LPS |
| 1374976_a_at                   | AI548897                 | 81782          | Sterol O-acyltransferase 1                        | Soat1            | 2.01                | 0.99137                       | NO                            | YES                          | <b>Acat-1.</b> Endoplasmic reticulum. Catalyzes the formation of cholesterol esters from cholesterol. Upregulated by TGF- $\beta$ . Upregulated in atheroma. <b>Activity increased in diabetic rats.</b>                                                                                                                                                                                                                                                                              |
| 1368963_at                     | NM_013160                | 25701          | Max interacting protein 1                         | Mxi1             | 2.20                | 0.98943                       | YES                           | NO                           | Member of the Myc/Max/Mad protein family. Transcriptional repressor. Negative regulator of Myc oncoprotein activity. Induced by hypoxia. Induced by TGF- $\beta$ .                                                                                                                                                                                                                                                                                                                    |
| 1390426_at                     | BF389398                 | 25496          | Notch gene homolog 1 (Drosophila)                 | Notch1           | 3.01                | 0.99998                       | NO                            | YES                          | Notch signaling pathway. Receptor for membrane bound ligands. Development/vascular development. Required in part for the TGF- $\beta$ cytostatic response. Expressed in EC and upregulated in vascular injury (EC and SMC). Both anti-apoptotic and pro-apoptotic. Activation of NF- $\kappa$ B.                                                                                                                                                                                      |
| 1374601_at                     | BI274482                 | 360697         | interferon gamma receptor 2 (predicted)           | Ifngr2_predicted | 1.96                | 0.99485                       | YES                           | NO                           | IFN $\gamma$ receptor $\beta$ chain. Signaling chain of the IFN $\gamma$ receptor. IFN- $\gamma$ signaling is activated in neointimal SMC. Upregulated in vascular injury and atherosclerosis. Potentiates the proliferative effect of PDGF on VSMC. IFN $\gamma$ is antifibrotic = inhibits the activity of p300--Smad coactivator/TGF- $\beta$ pathway.                                                                                                                             |
| <b>BMPs PATHWAY ACTIVATION</b> |                          |                |                                                   |                  |                     |                               |                               |                              |                                                                                                                                                                                                                                                                                                                                                                                                                                                                                       |
| 1390398_at                     | AI179372                 | 81507          | Bone morphogenetic protein receptor, type 1A      | Bmpr1a           | 2.46                | 0.99803                       | NO                            | NO                           | <b>ALK-3.</b> Serine/threonine kinase closely related to the TGF- $\beta$ receptor I. Receptors for BMPs                                                                                                                                                                                                                                                                                                                                                                              |
| 1380442_at                     | AI235507                 | 368178         | homeo box C8                                      | Hoxc8            | 0.33                | 0.99325                       | YES                           | YES                          | Transcription factor. Spatial patterning during embryogenesis. Interacts with Smad1 and smad6. Overexpression inhibits Smad1-dependent transcription of bone related genes                                                                                                                                                                                                                                                                                                            |
| 1370256_at                     | AA944349                 | 58868          | frizzled homolog 1 (Drosophila)                   | Fzd1             | 2.05                | 0.99272                       | YES                           | NO                           | Wnt receptor. G protein-coupled receptor. Wnt signaling pathways. Development, vascular development. Upregulated by BMP2.                                                                                                                                                                                                                                                                                                                                                             |
| 1373911_at                     | BM389026                 | 361945         | periostin, osteoblast specific factor (predicted) | Postn_predicted  | 2.41                | 0.99700                       | YES                           | NO                           | <b>Osteoblast specific factor 2.</b> Secreted adhesion molecule. Binds to integrins and promotes integrin-dependent cell adhesion and motility. Promotes SMC migration and proliferation, tumor survival, and angiogenesis. Upregulated by hypoxia, BMP2, TGF- $\beta$ , and growth factors. Upregulated in vascular injury (SMC).                                                                                                                                                    |

**Supplemental Table 3:** Gene expression profile of retinal vessels in diabetes. Differentially expressed genes related to **oxidative stress**

| REA 230 20 Index         | Representative Public ID | Entrez Gene ID | Gene Title                                                 | Gene Symbol | DM vs C fold change | DM vs C posterior probability | Changes corrected by sorbinil | Changes corrected by aspirin | Summary notes (from Entrez Gene and literature)                                                                                                                                                                                                                                                                                                                                                                 |
|--------------------------|--------------------------|----------------|------------------------------------------------------------|-------------|---------------------|-------------------------------|-------------------------------|------------------------------|-----------------------------------------------------------------------------------------------------------------------------------------------------------------------------------------------------------------------------------------------------------------------------------------------------------------------------------------------------------------------------------------------------------------|
| <b>PRO-OXIDANT</b>       |                          |                |                                                            |             |                     |                               |                               |                              |                                                                                                                                                                                                                                                                                                                                                                                                                 |
| 1387328_at               | NM_019184                | 29277          | Cytochrome P450, subfamily IIC (mephenytoin 4-hydroxylase) | Cyp2c       | 2.20                | 0.99950                       | YES                           | NO                           | Most abundant member of the p450 xenobiotic-inducible superfamily. ROS production. Metabolizes arachidonic acid to epoxyeicosatrienoic acids (EETs). EETs are vasodilator, inhibit platelet adhesion, and elicit endothelial cell proliferation and angiogenesis.                                                                                                                                               |
| 1371774_at               | AA893220                 | 302642         | spermidine/spermin e N1-acetyl transferase (mapped)        | Sat         | 2.09                | 0.99800                       | YES                           | NO                           | Rate-limiting enzyme of polyamine catabolism. Overexpression leads to generation of H2O2 and oxidative stress, inhibition of cell growth and apoptosis, and increased integrin-mediated cell migration. Upregulated in ischemia-reperfusion and by H2O2 (kidney, liver)                                                                                                                                         |
| 1371131_a_at             | U30789                   | 117514         | Thioredoxin interacting protein                            | Txnip       | 2.66                | 0.99899                       | YES                           | NO                           | <b>VDUP1</b> . Negative regulator of thioredoxin. Upregulation promotes oxidative stress. Pro-apoptotic. Upregulated by vitamin D3 and TGF- $\beta$ . <b>Upregulated by high glucose (glucose responsive elements in the promoter). Induced in diabetes (aorta, kidney, islets).</b>                                                                                                                            |
| <b>ANTI-OXIDANT</b>      |                          |                |                                                            |             |                     |                               |                               |                              |                                                                                                                                                                                                                                                                                                                                                                                                                 |
| 1369321_s_at             | NM_012840                | 25310          | cytochrome c, testis                                       | Cyct        | 0.30                | 0.99459                       | NO                            | YES                          | Testis specific cytochrome c; expressed during spermatogenesis. Involved in H2O2 detoxification: antioxidant.                                                                                                                                                                                                                                                                                                   |
| 1381650_at               | BM389433                 | 291314         | selenophosphate synthetase 1                               | Sephs1      | 1.99                | 0.99092                       | YES                           | YES                          | Synthesis of selenophosphate from selenide and ATP. Selenophosphate is used to synthesize selenocysteine, which is co-translationally incorporated into selenoproteins at in-frame UGA codons. Most selenoproteins are involved in redox balance (glutathione peroxidase, thioredoxin reductase) Overexpression leads to increased cell death in response to genotoxic conditions in a p53-dependent mechanism. |
| 1390416_at               | H35736                   | 361074         | solute carrier family 25, member 30                        | Slc25a30    | 2.16                | 0.99600                       | YES                           | NO                           | <b>Kidney mitochondrial carrier protein-1</b> . Mitochondrial carrier. Upregulated by fasting and during the regenerative phase of glycerol-induced renal failure in association with upregulation of superoxide-generating enzymes. Proposed function: shift from carbohydrate to lipid metabolism and protection from oxidative damage.                                                                       |
| <b>PRO-/ANTI-OXIDANT</b> |                          |                |                                                            |             |                     |                               |                               |                              |                                                                                                                                                                                                                                                                                                                                                                                                                 |
| 1368418_a_at             | AF202115                 | 24268          | ceruloplasmin                                              | Cp          | 3.68                | 1.00000                       | NO                            | NO                           | Copper-containing ferroxidase. Copper and iron metabolism and homeostasis. Inflammatory response, acute-phase response protein. Exerts both anti-oxidant and pro-oxidant (on lipoproteins) effects. <b>Upregulated in retinal Müller cells in diabetes.</b>                                                                                                                                                     |
| 1368419_at               | AF202115                 | 24268          | ceruloplasmin                                              | Cp          | 2.65                | 1.00000                       | NO                            | NO                           | Copper-containing ferroxidase. Copper and iron metabolism and homeostasis. Inflammatory response, acute-phase response protein. Exerts both anti-oxidant and pro-oxidant (on lipoproteins) effects. <b>Upregulated in retinal Müller cells in diabetes.</b>                                                                                                                                                     |
| 1368420_at               | NM_012532                | 24268          | ceruloplasmin                                              | Cp          | 4.80                | 1.00000                       | NO                            | NO                           | Copper-containing ferroxidase. Copper and iron metabolism and homeostasis. Inflammatory response, acute-phase response protein. Exerts both anti-oxidant and pro-oxidant (on lipoproteins) effects. <b>Upregulated in retinal Müller cells in diabetes.</b>                                                                                                                                                     |

**Supplemental Table 4:** Gene expression profile of retinal vessels in diabetes. Differentially expressed genes related to **inflammation/response to injury**.

| REA 230 20 Index                     | Representative Public ID | Entrez Gene ID | Gene Title                                         | Gene Symbol | DM vs C fold change | DM vs C posterior probability | Changes corrected by sorbinil | Changes corrected by aspirin | Summary notes (from Entrez Gene and literature)                                                                                                                                                                                                                                                                                                                                               |
|--------------------------------------|--------------------------|----------------|----------------------------------------------------|-------------|---------------------|-------------------------------|-------------------------------|------------------------------|-----------------------------------------------------------------------------------------------------------------------------------------------------------------------------------------------------------------------------------------------------------------------------------------------------------------------------------------------------------------------------------------------|
| <b>INFLAMMATORY MEDIATORS</b>        |                          |                |                                                    |             |                     |                               |                               |                              |                                                                                                                                                                                                                                                                                                                                                                                               |
| 1386987_at                           | NM_017020                | 24499          | interleukin 6 receptor, alpha                      | Il6ra       | 2.02                | 0.99925                       | YES                           | NO                           | <b>IL-6R<math>\alpha</math>, CD126.</b> Subunit $\alpha$ of the IL-6 receptor complex. Binds IL-6 and recruits gp130. IL-6 signals by phosphorylating STAT3 and it is pro-angiogenic.                                                                                                                                                                                                         |
| 1370224_at                           | BE113920                 | 25125          | signal transducer and activator of transcription 3 | Stat3       | 2.38                | 0.99769                       | YES                           | NO                           | Transcription factor downstream of IL-6 and other IL-6 family members that use the gp130 receptor. Pro-angiogenic. Upregulated in retina neovessels (hyperoxia model of ROP).                                                                                                                                                                                                                 |
| 1371781_at                           | BI285863                 | 25125          | signal transducer and activator of transcription 3 | Stat3       | 2.20                | 0.99719                       | YES                           | NO                           | Transcription factor downstream of IL-6 and other IL-6 family members that use the gp130 receptor. Pro-angiogenic. Upregulated in retina neovessels (hyperoxia model of ROP).                                                                                                                                                                                                                 |
| 1372064_at                           | BI296385                 | 497942         | similar to chemokine (C-X-C motif) ligand 16       | Cxcl16      | 2.04                | 0.99174                       | YES                           | NO                           | Chemokine family similar to fractalkine. Transmembrane form is an adhesion molecule, the cleaved soluble form is a chemokine = recruitment of CXCR6 expressing T, NK, NKT cells to site of inflammation/injury. CXCL16 also functions as a scavenger receptor for phosphatidylserine and oxidized LDL = promotes foam cell formation. Induces SMC proliferation.                              |
| 1368259_at                           | NM_017043                | 24693          | prostaglandin-endoperoxide synthase 1              | Ptgs1       | 2.04                | 0.99900                       | NO                            | YES                          | <b>Cyclooxygenase 1, COX-1.</b> Prostaglandin synthesis. Constitutive isoform. Inhibited by aspirin. Upregulated in EC in tissue injury (cirrhotic liver, traumatic brain injury) and by estrogen/progesterone. Upregulated by TGF- $\beta$ . <b>In diabetes: upregulated in kidney medulla, downregulated in aorta and sciatic nerve.</b>                                                    |
| 1386879_at                           | NM_031832                | 83781          | lectin, galactose binding, soluble 3               | Lgals3      | 5.10                | 0.99931                       | YES                           | NO                           | <b>Galectin 3.</b> IgE-binding lectin. Multiple extracellular and intracellular functions. Immediate early gene. Cell-cell and cell-matrix interaction. Laminin-binding. RAGE ligand. Amplifier of inflammation. Anti-apoptotic. Pro-angiogenic. Upregulated in vascular injury. <b>Upregulated in diabetes (kidney, retinal Müller cells, hippocampus) and by glucose (mesangial cell).</b>  |
| <b>ACUTE-PHASE RESPONSE PROTEINS</b> |                          |                |                                                    |             |                     |                               |                               |                              |                                                                                                                                                                                                                                                                                                                                                                                               |
| 1367794_at                           | NM_012488                | 24153          | alpha-2-macroglobulin                              | A2m         | 2.90                | 1.00000                       | YES                           | NO                           | Broad spectrum protease inhibitor. Inflammatory response, acute-phase response protein. Antiangiogenic. Binds cytokines and growth factors and regulates their biological activity. <b>Upregulated in retinal Müller cells in diabetes.</b>                                                                                                                                                   |
| 1370907_at                           | M83143                   | 25197          | Beta galactoside alpha 2,6 sialyltransferase 1     | St6gal1     | 2.19                | 0.99629                       | YES                           | NO                           | Sialylation of N-linked oligosaccharide of glycoproteins/ glycolipids. Ubiquitously expressed with tissue-specific isoforms/regulation. The hepatic form is an Acute-Phase Protein (induced by IL-6). Membrane protein (golgi) and secreted (cleavage by cathepsin-S-like). Upregulated in HUVEC by LPS, and cytokines. Upregulated by Ras oncogene leads to changes in integrin sialylation. |
| 1368418_a_at                         | AF202115                 | 24268          | ceruloplasmin                                      | Cp          | 3.68                | 1.00000                       | NO                            | NO                           | Copper-containing ferroxidase. Copper and iron metabolism and homeostasis. Inflammatory response, acute-phase response protein. Exerts both anti-oxidant and pro-oxidant (on lipoproteins) effects. <b>Upregulated in retinal Müller cells in diabetes.</b>                                                                                                                                   |
| 1368419_at                           | AF202115                 | 24268          | ceruloplasmin                                      | Cp          | 2.65                | 1.00000                       | NO                            | NO                           | Copper-containing ferroxidase. Copper and iron metabolism and homeostasis. Inflammatory response, acute-phase response protein. Exerts both anti-oxidant and pro-oxidant (on lipoproteins) effects. <b>Upregulated in retinal Müller cells in diabetes.</b>                                                                                                                                   |
| 1368420_at                           | NM_012532                | 24268          | ceruloplasmin                                      | Cp          | 4.80                | 1.00000                       | NO                            | NO                           | Copper-containing ferroxidase. Copper and iron metabolism and homeostasis. Inflammatory response, acute-phase response protein. Exerts both anti-oxidant and pro-oxidant (on lipoproteins) effects. <b>Upregulated in retinal Müller cells in diabetes.</b>                                                                                                                                   |
| 1387893_at                           | D88250                   | 192262         | complement component 1, s subcomponent             | C1s         | 2.91                | 0.99916                       | YES                           | NO                           | Classical complement pathway. Acute-phase response protein. Inhibited by SERPING1 (UP). Increased in aortic tissue of hypercholesterolemic mice. Increased in serum in familiar hypercholesterolemia. <b>Upregulated in retinal Müller cells in diabetes.</b>                                                                                                                                 |
| 1383391_a_at                         | AI716125                 | 24231          | complement component 2                             | C2          | 2.42                | 0.99837                       | YES                           | NO                           | Classical complement pathway. Acute-phase response protein. Induced by IFN $\gamma$ , and other cytokines.                                                                                                                                                                                                                                                                                    |



| REA 230 20 Index                      | Representative Public ID | Entrez Gene ID | Gene Title                                                   | Gene Symbol      | DM vs C fold change | DM vs C posterior probability | Changes corrected by sorbinil | Changes corrected by aspirin | Summary notes (from Entrez Gene and literature)                                                                                                                                                                                                                                                                                                                                                                                     |
|---------------------------------------|--------------------------|----------------|--------------------------------------------------------------|------------------|---------------------|-------------------------------|-------------------------------|------------------------------|-------------------------------------------------------------------------------------------------------------------------------------------------------------------------------------------------------------------------------------------------------------------------------------------------------------------------------------------------------------------------------------------------------------------------------------|
| 1368000_at                            | NM_016994                | 24232          | complement component 3                                       | C3               | 3.50                | 0.99990                       | NO                            | NO                           | Complement pathway. Acute-phase response protein. Induced by IFN $\gamma$ , and other cytokines. Increased in aortic tissue of hypercholesterolemic mice. Increased in serum in familial hypercholesterolemia. <b>Upregulated in retinal Müller cells in diabetes.</b>                                                                                                                                                              |
| 1389470_at                            | AI639117                 | 294257         | Complement factor B                                          | Cfb              | 2.27                | 0.99545                       | YES                           | NO                           | Complement alternative pathway. Acute-phase response protein. Induced by IFN $\gamma$ , and other cytokines. <b>Upregulated in retinal Müller cells in diabetes.</b>                                                                                                                                                                                                                                                                |
| 1387011_at                            | NM_130741                | 170496         | lipocalin 2                                                  | Lcn2             | 4.21                | 0.99947                       | NO                            | NO                           | <b>Neutrophil gelatinase-associated lipocalin (NGAL), oncogene24p3.</b> Member of the lipocalin family. Iron delivery pathway. Acute-phase response protein upregulated in inflammation. Modulates the activity of matrix MMPs (by preventing inactivation by TIMP1). Upregulated in atheroma and MI (vascular inflammation, plaque instability). <b>Upregulated in retinal Müller cells in diabetes.</b>                           |
| 1368224_at                            | NM_031531                | 24795          | Serine (or cysteine) peptidase inhibitor, clade A, member 3N | Serpina3n        | 5.46                | 0.99158                       | YES                           | NO                           | Homolog of human and mouse antichymotrypsin. Acute-phase response protein. Induced by IL-6 via STAT3 (liver). <b>Upregulated in retinal Müller cells in diabetes.</b>                                                                                                                                                                                                                                                               |
| <b>IFN<math>\gamma</math> PATHWAY</b> |                          |                |                                                              |                  |                     |                               |                               |                              |                                                                                                                                                                                                                                                                                                                                                                                                                                     |
| 1374601_at                            | BI274482                 | 360697         | interferon gamma receptor 2 (predicted)                      | Ifngr2_predicted | 1.96                | 0.99485                       | YES                           | NO                           | IFN $\gamma$ receptor $\beta$ chain. Signaling chain of the IFN $\gamma$ receptor. IFN- $\gamma$ signaling is activated in neointimal SMC. Upregulated in vascular injury and atherosclerosis. Potentiates the proliferative effect of PDGF on VSMC. IFN $\gamma$ is antifibrotic = inhibits the activity of p300--Smad coactivator/TGF- $\beta$ pathway.                                                                           |
| 1370913_at                            | AI409634                 | 65190          | Best5 protein                                                | Best5            | 2.10                | 0.99432                       | NO                            | NO                           | Induced by IFN $\gamma$ . Ossification. <b>Upregulated in retinal Müller cells in diabetes.</b>                                                                                                                                                                                                                                                                                                                                     |
| 1367595_s_at                          | NM_012512                | 24223          | beta-2 microglobulin                                         | B2m              | 2.03                | 0.99700                       | YES                           | NO                           | Induced by IFN $\gamma$ in HUVEC. Induced in inflammation and injury. Pro- apoptotic. Inhibits NF- $\kappa$ B and activates STAT3. Chaperone of MHC class I molecules. Antigen presentation. Interacts with CD1d1 antigen. Iron metabolism.                                                                                                                                                                                         |
| 1387005_at                            | NM_017320                | 50654          | cathepsin S                                                  | Ctss             | 2.10                | 0.99900                       | YES                           | NO                           | Lysosomal cysteine protease. Elastolytic and collagenolytic activity. Degradation of proteoglycans. Upregulated by IFN $\gamma$ . Mediates interferon-induced apoptosis. MHCII antigen presentation (degradation of the MHC invariant chain CD74). Upregulated in EC by cytokine/growth factors. Pro-angiogenic. Upregulated in atheroma and vascular injury. <b>Serum levels increased in DM with atherosclerosis and obesity.</b> |
| 1386913_at                            | NM_019358                | 54320          | podoplanin                                                   | Pdpn             | 2.02                | 0.99600                       | YES                           | NO                           | Mucin-type small membrane glycoprotein. Expressed in lymphatic EC, podocytes, alveolar type I cells, and epithelial cells. Induced in HUVEC and microvascular EC by IFN $\gamma$ , IL-3, TNF- $\alpha$ . Induced by TGF- $\beta$ (tumor cells). Lymphatic development. Promotes cell adhesion, migration, and tube formation. Ectopic expression = actin reorganization and cell motility.                                          |
| 1367786_at                            | NM_080767                | 24968          | proteasome (prosome, macropain) subunit, beta type 8         | Psm8             | 2.73                | 0.99846                       | YES                           | NO                           | Member of the proteasome B-type family. Induced by IFN- $\gamma$ . Antigen presentation.                                                                                                                                                                                                                                                                                                                                            |
| 1396268_at                            | BF523991                 | 301570         | SP110 nuclear body protein                                   | Sp110            | 2.38                | 0.99606                       | NO                            | NO                           | <b>IF-induced P 41 30kD; IF-induced P 75 52kD.</b> Induced by IFN $\gamma$ . Negative regulation of RAR $\alpha$ -mediated transcription.                                                                                                                                                                                                                                                                                           |
| 1397221_s_at                          | BE108106                 | 246097         | Tumor necrosis factor receptor superfamily, member 6         | Tnfrsf6          | 2.60                | 1.00000                       | NO                            | NO                           | <b>FAS, CD95 antigen.</b> Member of the TNF-receptor superfamily. Induces apoptosis. EC are usually resistant, while VSMC are susceptible to FAS-induced apoptosis. Induced by cytokines (IFN $\gamma$ , TNF- $\alpha$ , IL-1 $\beta$ in EC and VSMC; TGF $\beta$ in gastric carcinoma cells). Upregulated in vascular injury. FAS/FASL deficiency increases neovascularization. <b>Upregulated in retinal vessels in diabetes.</b> |
| <b>ANTIGEN PRESENTATION</b>           |                          |                |                                                              |                  |                     |                               |                               |                              |                                                                                                                                                                                                                                                                                                                                                                                                                                     |
| 1368593_at                            | NM_017079                | 25109          | CD1d1 antigen                                                | Cd1d1            | 2.09                | 0.99943                       | YES                           | NO                           | Antigen presentation (lipid antigen). MHC class 1b. Expressed in T cells, NKT cells, and VSMC. Interacts with $\beta$ -2 microglobulin and CD74.                                                                                                                                                                                                                                                                                    |



| REA 230 20 Index         | Representative Public ID | Entrez Gene ID | Gene Title                                                                                            | Gene Symbol | DM vs C fold change | DM vs C posterior probability | Changes corrected by sorbinil | Changes corrected by aspirin | Summary notes (from Entrez Gene and literature)                                                                                                                                                                                                                                                                                                                                                                       |
|--------------------------|--------------------------|----------------|-------------------------------------------------------------------------------------------------------|-------------|---------------------|-------------------------------|-------------------------------|------------------------------|-----------------------------------------------------------------------------------------------------------------------------------------------------------------------------------------------------------------------------------------------------------------------------------------------------------------------------------------------------------------------------------------------------------------------|
| 1367679_at               | NM_013069                | 25599          | CD74 antigen (invariant polypeptide of major histocompatibility complex, class II antigen-associated) | Cd74        | 4.47                | 1.00000                       | NO                            | NO                           | <b>li, la-associated invariant chain.</b> Antigen presentation. Accessory signaling molecule. The cleaved cytosolic fragment of CD74 translocates to the nucleus and activates transcription mediated by NF- $\kappa$ B. Interacts with CD1d1 and CD44. Induced by IFN. <b>Upregulated in retinal Müller cells in diabetes.</b>                                                                                       |
| 1387568_at               | NM_031713                | 65146          | paired-Ig-like receptor B                                                                             | Pirb        | 0.31                | 0.99827                       | YES                           | NO                           | Immunoglobulin-like receptor. MHC class I recognition system. Inhibits chemokine and integrin signaling.                                                                                                                                                                                                                                                                                                              |
| 1388071_x_at             | M24024                   | 24737          | RT1 class Ib, locus Aw2                                                                               | RT1-Aw2     | 2.08                | 0.99462                       | YES                           | NO                           | Class Ib gene of the rat major histocompatibility complex. Antigen presentation and processing. <b>Upregulated in retinal Müller cells in diabetes.</b>                                                                                                                                                                                                                                                               |
| <b>ANTI-INFLAMMATORY</b> |                          |                |                                                                                                       |             |                     |                               |                               |                              |                                                                                                                                                                                                                                                                                                                                                                                                                       |
| 1392171_at               | AA945643                 | 89824          | chitinase 3-like 1                                                                                    | Chi3l1      | 2.19                | 0.98982                       | YES                           | NO                           | <b>Cartilage glycoprotein-39.</b> Member of chi-lectin family. Induced in inflammation, tissue remodeling (connective tissue turnover), atheroma, and tumors. Promotes migration and adhesion of VSMC and EC. Induces HUVEC tubulogenesis. Mitogenic (via AKT). Inhibits cytokines signaling = anti-inflammatory.                                                                                                     |
| 1372254_at               | AW915763                 | 295703         | serine (or cysteine) peptidase inhibitor, clade G, member 1                                           | Serping1    | 4.10                | 0.99896                       | YES                           | NO                           | <b>C1 inhibitor.</b> Inhibitor of complement activation (C1s and C1r, classical pathway) and other proteases (kallikrein, plasmin and coagulation factors). Inhibits leukocytes adhesion (anti-inflammatory). Inhibits vascular leakage (deficiency = angioedema hereditary, knockout=increased vascular permeability). Prevents ischemia/reperfusion injury. <b>Upregulated in retinal Müller cells in diabetes.</b> |
| 1385397_at               | AA859085                 | 499991         | Ab1-219                                                                                               | LOC499991   | 2.00                | 0.99261                       | NO                            | NO                           | Rat homolog of mouse and human STEAP4/STAMP2 (Tiarp, Tnfa-induced adipose-related protein) expressed during adipocyte differentiation. Induced by TNFa, IL6, GH, and FA in adipocytes. Regulated by androgen. Metalloreductase involved in iron and copper uptake. Suppressor of inflammation under nutrient-rich condition.                                                                                          |

**Supplemental Table 5:** Gene expression profile of retinal vessels in diabetes. Differentially expressed genes related to **matrix and vascular remodeling**.

| REA 230 20 Index     | Representative Public ID | Entrez Gene ID | Gene Title                                                                                               | Gene Symbol     | DM vs C fold change | DM vs C posterior probability | Changes corrected by sorbinil | Changes corrected by aspirin | Summary notes (from Entrez Gene and literature)                                                                                                                                                                                                                                                                                                                                                                                                                                                                                                                                                                                  |
|----------------------|--------------------------|----------------|----------------------------------------------------------------------------------------------------------|-----------------|---------------------|-------------------------------|-------------------------------|------------------------------|----------------------------------------------------------------------------------------------------------------------------------------------------------------------------------------------------------------------------------------------------------------------------------------------------------------------------------------------------------------------------------------------------------------------------------------------------------------------------------------------------------------------------------------------------------------------------------------------------------------------------------|
| <b>MATRIX</b>        |                          |                |                                                                                                          |                 |                     |                               |                               |                              |                                                                                                                                                                                                                                                                                                                                                                                                                                                                                                                                                                                                                                  |
| 1382189_at           | AI574779                 | 25615          | syndecan 2                                                                                               | Sdc2            | 2.09                | 0.99900                       | NO                            | YES                          | <b>Heparan sulfate proteoglycan 1.</b> Proteoglycan receptor of the ECM. Connection between ECM and actin cytoskeleton. Binds laminin, FN, growth factors, and a variety of other molecules. Highly expressed in brain vessels. Cell proliferation and migration. Interacts with FGF2, VEGF, and TGF- $\beta$ superfamily = growth factor presentation to the specific receptor and co-receptor. Upregulated by TNF- $\alpha$ (HUVEC), TGF- $\beta$ 1, and BMP-2. Syndecan-2 overexpression leads to upregulation of TGF- $\beta$ RI and RII. <b>Increased in diabetes (kidney) = regulates TGF-<math>\beta</math> activity.</b> |
| 1379300_at           | AW520944                 | 367145         | carbohydrate sulfotransferase 2 (predicted)                                                              | Chst2_predicted | 1.98                | 0.99600                       | YES                           | NO                           | Sulfation of chondroitin at position 6-O. Keratan sulfate biosynthesis. Lymphocyte homing.                                                                                                                                                                                                                                                                                                                                                                                                                                                                                                                                       |
| 1391022_at           | BE101834                 | 305078         | laminin, beta 3                                                                                          | Lamb3           | 0.38                | 0.99247                       | NO                            | NO                           | Components of laminin-5. Binds dystroglycan, syndecan, and integrins.                                                                                                                                                                                                                                                                                                                                                                                                                                                                                                                                                            |
| 1371310_s_at         | BI285495                 | 29345          | serine (or cysteine) proteinase inhibitor, clade H, member 1                                             | Serpinh1        | 2.49                | 1.00000                       | NO                            | NO                           | <b>HSP47, colligin.</b> Member of the serpin superfamily of serine proteinase inhibitors. Molecular chaperone involved in the maturation of collagen molecules. Upregulated by TGF- $\beta$ in rat skeletal myoblasts, mouse osteoblasts, and human embryonic lung fibroblast =fibrosis. Upregulated in atherosclerotic lesions (SMC) and in lesions of fibrotic diseases. Interacts with Cd9.                                                                                                                                                                                                                                   |
| 1392990_at           | AI031004                 | 312936         | SRY-box containing gene 17 (predicted)                                                                   | Sox17_predicted | 2.58                | 0.99873                       | NO                            | NO                           | Transcriptional regulator. Enhances fibronectin and laminin transcription. Inhibits Wnt signaling by binding to $\beta$ -catenin.                                                                                                                                                                                                                                                                                                                                                                                                                                                                                                |
| <b>CELL ADHESION</b> |                          |                |                                                                                                          |                 |                     |                               |                               |                              |                                                                                                                                                                                                                                                                                                                                                                                                                                                                                                                                                                                                                                  |
| 1370907_at           | M83143                   | 25197          | Beta galactoside alpha 2,6 sialyltransferase 1                                                           | St6gal1         | 2.19                | 0.99629                       | YES                           | NO                           | Sialylation of N-linked oligosaccharide of glycoproteins/ glycolipids. Ubiquitously expressed with tissue-specific isoforms/regulation. The hepatic form is an Acute-Phase Protein (induced by IL-6). Membrane protein (golgi) and secreted (cleavage by cathepsin-S-like). Upregulated in HUVEC by LPS, and cytokines. Upregulated by Ras oncogene leads to changes in integrin sialylation.                                                                                                                                                                                                                                    |
| 1389095_at           | BE110539                 | 360715         | biregional cell adhesion molecule-related/down-regulated by oncogenes (Cdon) binding protein (predicted) | Boc_predicted   | 2.11                | 0.99528                       | NO                            | YES                          | Receptor of the Ig/fibronectin type III repeat family. Involved in myogenic differentiation. Cell-cell contact. Interacts with cadherin.                                                                                                                                                                                                                                                                                                                                                                                                                                                                                         |
| 1371499_at           | AI227627                 | 24936          | CD9 antigen                                                                                              | Cd9             | 2.00                | 0.99184                       | YES                           | NO                           | <b>Tetraspanin 29.</b> Cell surface glycoprotein member of the tetraspanin family (tetraspanins forms membrane microdomains involved in integrin-dependent adhesion strengthening, migration, and signaling). Highly abundant on EC surface. Involved in cell adhesion and migration (via integrin). Inhibits SMC migration (by inhibiting integrin clustering). Leukocyte adhesion and transmigration. Triggers platelet activation. Interacts with tetraspanin 8, Serpinh1, and Ifitm3/fragilis.                                                                                                                               |
| 1375936_at           | BI279663                 | 291760         | desmocollin 2                                                                                            | Dsc2            | 3.13                | 0.99961                       | NO                            | NO                           | Desmosomal cadherin. Expressed primarily in epithelial cells. Desmocollin (and desmogleins) are the adhesive proteins of the desmosome cell-cell junction and are required for cell adhesion and desmosome formation.                                                                                                                                                                                                                                                                                                                                                                                                            |
| 1371430_at           | AW251326                 | 114489         | dystroglycan 1                                                                                           | Dag1            | 2.06                | 0.99600                       | YES                           | NO                           | Non-integrin adhesion molecule. Laminin-binding component of the dystrophin-glycoprotein complex (linkage between the cytoskeleton and the extracellular matrix). Required for basement membrane organization. Expressed in EC at the blood-brain barrier. Upregulated in tumor EC.                                                                                                                                                                                                                                                                                                                                              |

| REA 230 20 Index           | Representative Public ID | Entrez Gene ID | Gene Title                                                                                                 | Gene Symbol        | DM vs C fold change | DM vs C posterior probability | Changes corrected by sorbinil | Changes corrected by aspirin | Summary notes (from Entrez Gene and literature)                                                                                                                                                                                                                                                                                                                                                                                                                                                                                                                                                                    |
|----------------------------|--------------------------|----------------|------------------------------------------------------------------------------------------------------------|--------------------|---------------------|-------------------------------|-------------------------------|------------------------------|--------------------------------------------------------------------------------------------------------------------------------------------------------------------------------------------------------------------------------------------------------------------------------------------------------------------------------------------------------------------------------------------------------------------------------------------------------------------------------------------------------------------------------------------------------------------------------------------------------------------|
| 1392888_at                 | AI071251                 | 317322         | glypican 4                                                                                                 | Gpc4               | 1.97                | 0.98575                       | NO                            | NO                           | <b>k-glypican.</b> GPI-anchored heparan sulphate proteoglycans that modulate signaling by growth factors: HSPGs are low-affinity accessory binding sites that facilitate or stabilize binding of the ligand to its high-affinity receptor. Control of cell division and growth regulation. Glypican-4 is expressed in synovial vessels (EC, pericytes and SMC), HUVEC, renal tubular cells. Glypican-4 binds: endostatin and mediates endostatin anti-angiogenic function, FGF2: regulation of FGF2 action during cortical neurogenesis, and HGF.                                                                  |
| 1373911_at                 | BM389026                 | 361945         | periostin, osteoblast specific factor (predicted)                                                          | Postn_predicted    | 2.41                | 0.99700                       | YES                           | NO                           | <b>Osteoblast specific factor 2.</b> Secreted adhesion molecule. Binds to integrins and promotes integrin-dependent cell adhesion and motility. Promotes SMC migration and proliferation, tumor survival, and angiogenesis. Upregulated by hypoxia, BMP2, TGF- $\beta$ , and growth factors. Upregulated in vascular injury (SMC).                                                                                                                                                                                                                                                                                 |
| 1387568_at                 | NM_031713                | 65146          | paired-Ig-like receptor B                                                                                  | Pirb               | 0.31                | 0.99827                       | YES                           | NO                           | Immunoglobulin-like receptor. MHC class I recognition system. Inhibits chemokine and integrin signaling.                                                                                                                                                                                                                                                                                                                                                                                                                                                                                                           |
| <b>ACTIN ORGANIZATION</b>  |                          |                |                                                                                                            |                    |                     |                               |                               |                              |                                                                                                                                                                                                                                                                                                                                                                                                                                                                                                                                                                                                                    |
| 1392250_at                 | AI145827                 | 56611          | Annexin A2                                                                                                 | Anxa2              | 0.37                | 0.99127                       | NO                            | YES                          | <b>Lipocortin2, calpactin 1 heavy chain.</b> Member of the annexin family. Annexins (in combination with members of the S100A family) bind charged phospholipids in a Ca <sup>2+</sup> -dependent manner, a property required for membrane fusion=vesicles trafficking (endocytosis/exocytosis), and tight junction assembly (annexinA2/S100A10 heterotetramer). AnnexinA2 is also involved in the organization of membrane-associated actin at sites of cholesterol enriched membrane rafts. AnnexinA2 on EC luminal surface binds PA and tPA = antithrombogenic; plasminogen receptor; interacts with CD44 (up). |
| 1383546_at                 | BE097393                 | 302421         | glycerophosphodiester phosphodiesterase domain containing 2 (predicted)                                    | Gdpd2_predicted    | 2.73                | 0.98718                       | YES                           | NO                           | Osteoblast differentiation: expressed at the stage of matrix maturation in association with actin filament disappearance. Actin cytoskeleton organization                                                                                                                                                                                                                                                                                                                                                                                                                                                          |
| 1385433_at                 | AI576354                 | 362918         | metastasis suppressor 1 (predicted)                                                                        | Mtss1_predicted    | 0.47                | 0.99210                       | NO                            | YES                          | Scaffold protein that interacts with Rac, actin, and actin-associated proteins to modulate lamellipodia formation. promotes actin organization. Mtss1 inhibits WASP-mediated actin polymerization. Overexpression inhibits cell motility.                                                                                                                                                                                                                                                                                                                                                                          |
| 1370339_at                 | L24775                   | 117557         | Tropomyosin 3, gamma                                                                                       | Tpm3               | 2.20                | 0.99800                       | YES                           | NO                           | <b>Tropomyosin <math>\gamma</math>, Tpm5.</b> Nonmuscle low-molecular weight tropomyosin (many isoforms). Promotes actin filament stability, vesicle trafficking, and cell motility. Overexpression = increased stress fiber.                                                                                                                                                                                                                                                                                                                                                                                      |
| 1376124_at                 | BG375480                 | 296936         | Wiskott-Aldrich syndrome-like (human)                                                                      | Wasl               | 1.97                | 0.99290                       | YES                           | YES                          | <b>N-WASP.</b> Regulation of the cortical actin cytoskeleton. Activator of the Arp2/3 complex = branching of actin filaments. Ubiquitously expressed.                                                                                                                                                                                                                                                                                                                                                                                                                                                              |
| <b>VASCULAR REMODELING</b> |                          |                |                                                                                                            |                    |                     |                               |                               |                              |                                                                                                                                                                                                                                                                                                                                                                                                                                                                                                                                                                                                                    |
| 1379586_at                 | BF564116                 | 361332         | A disintegrin-like and metallopeptidase (reprolysin type) with thrombospondin type 1 motif, 19 (predicted) | Adamts19_predicted | 1.83                | 0.98966                       | YES                           | NO                           | member of the ADAMTS family (subgroup f).                                                                                                                                                                                                                                                                                                                                                                                                                                                                                                                                                                          |

| REA 230 20 Index | Representative Public ID | Entrez Gene ID | Gene Title                                                                                   | Gene Symbol | DM vs C fold change | DM vs C posterior probability | Changes corrected by sorbinil | Changes corrected by aspirin | Summary notes (from Entrez Gene and literature)                                                                                                                                                                                                                                                                                                                                                                                                                                                                                                                                                                                                                                                                                                                                                                                                                                                                          |
|------------------|--------------------------|----------------|----------------------------------------------------------------------------------------------|-------------|---------------------|-------------------------------|-------------------------------|------------------------------|--------------------------------------------------------------------------------------------------------------------------------------------------------------------------------------------------------------------------------------------------------------------------------------------------------------------------------------------------------------------------------------------------------------------------------------------------------------------------------------------------------------------------------------------------------------------------------------------------------------------------------------------------------------------------------------------------------------------------------------------------------------------------------------------------------------------------------------------------------------------------------------------------------------------------|
| 1368223_at       | NM_024400                | 79252          | a disintegrin-like and metallopeptidase (repolysin type) with thrombospondin type 1 motif, 1 | Adamts1     | 2.72                | 1.00000                       | NO                            | NO                           | Member of the ADAMTS family of metalloprotease. Degradation of proteoglycans. Upregulated in inflammation, MI (early ischemic response gene), wound healing, atheroma. Antiangiogenic.                                                                                                                                                                                                                                                                                                                                                                                                                                                                                                                                                                                                                                                                                                                                   |
| 1374778_at       | AI409046                 | 25423          | cathepsin C                                                                                  | Ctsc        | 2.19                | 0.99497                       | YES                           | NO                           | Cysteine dipeptidyl aminopeptidase. Activator of serine proteases involved in immune and inflammatory responses. Deficiency protects against acute arthritis. Proteoglycan degradation.                                                                                                                                                                                                                                                                                                                                                                                                                                                                                                                                                                                                                                                                                                                                  |
| 1387005_at       | NM_017320                | 50654          | cathepsin S                                                                                  | Ctss        | 2.10                | 0.99900                       | YES                           | NO                           | Lysosomal cysteine protease. Elastolytic and collagenolytic activity. Degradation of proteoglycans. Upregulated by IFN $\gamma$ . Mediates interferon-induced apoptosis. MHCII antigen presentation (degradation of the MHC invariant chain CD74). Upregulated in EC by cytokine/growth factors. Pro-angiogenic. Upregulated in atheroma and vascular injury. <b>Serum levels increased in DM with atherosclerosis and obesity.</b>                                                                                                                                                                                                                                                                                                                                                                                                                                                                                      |
| 1368921_a_at     | NM_012924                | 25406          | CD44 antigen                                                                                 | Cd44        | 2.05                | 0.99900                       | NO                            | NO                           | Cell-surface glycoprotein. Receptor for hyaluronic acid (HA) and other ligands (osteopontin, collagens, MMPs). Multiple isoforms (alternative splicing). Cell-cell and cell-matrix interactions, cell adhesion and migration. Cytokines/growth factors presentation. Binding of HA to CD44 leads to NF- $\kappa$ B activation. Induced in inflammation by cytokines and growth factors (TNF $\alpha$ , IL-1 $\beta$ , TGF- $\beta$ , IFN, HGF, VEGF, and FGF). Upregulated in vascular injury. Pro-angiogenic. Interacts with TGF $\beta$ R1 = enhances TGF- $\beta$ signaling. Interacts with CD74.                                                                                                                                                                                                                                                                                                                     |
| 1392171_at       | AA945643                 | 89824          | chitinase 3-like 1                                                                           | Chi3l1      | 2.19                | 0.98982                       | YES                           | NO                           | <b>Cartilage glycoprotein-39.</b> Member of chi-lectin family. Induced in inflammation, tissue remodeling (connective tissue turnover), atheroma, and tumors. Promotes migration and adhesion of VSMC and EC. Induces HUVEC tubulogenesis. Mitogenic (via AKT). Inhibits cytokines signaling = anti-inflammatory.                                                                                                                                                                                                                                                                                                                                                                                                                                                                                                                                                                                                        |
| 1367631_at       | NM_022266                | 64032          | connective tissue growth factor                                                              | Ctgf        | 2.11                | 0.99200                       | YES                           | YES                          | Member of the CNN family of matricellular proteins initially discovered as a protein secreted by EC. Induced by TGF- $\beta$ is a downstream mediator of TGF- $\beta$ = fibrosis. Promotes EC proliferation, migration, adhesion, survival = pro-angiogenic. Binds BMPs (inhibition of BMP signaling) and TGF- $\beta$ 1 (activation of TGF- $\beta$ signaling). Upregulated in wound healing and fibrotic diseases. <b>Upregulated in diabetes (retina and kidney glomeruli) and by high glucose (mesangial cells) via TGF-<math>\beta</math>.</b>                                                                                                                                                                                                                                                                                                                                                                      |
| 1393067_at       | AI710931                 | 89804          | endothelial-specific receptor tyrosine kinase                                                | Tek         | 2.07                | 0.99197                       | NO                            | NO                           | Angiopoietins receptor. Expressed almost exclusively in EC both in quiescent vessels and angiogenesis. Defects in TEK are associated with inherited venous malformations: TEK signaling pathway is critical for endothelial cell-smooth muscle cell communication in venous morphogenesis. Required for physiological (development) and pathological angiogenesis. Tek/Tie2 signaling depends on the ligand: Ang1 leads to activation of an EC survival pathway and angiogenesis; Ang2 is a contest-dependent agonist/antagonist of Tie 2 signaling and can leads either to vascular regression or survival. Upregulated by IL-1 $\beta$ and TNF- $\alpha$ in EC in vitro. Upregulated by hypoxia in BRP in vitro. Upregulated in ROP. <b>In vivo upregulated in diabetic kidney (STZ rats) and MI (rats), epiretinal membranes (retinal ischemic diseases), synovial tissue in RA and OA, hemangioma and psoriasis.</b> |
| 1383641_at       | BF414702                 | 24326          | endothelin receptor type A                                                                   | Ednra       | 2.57                | 1.00000                       | NO                            | YES                          | Endothelin receptor (ETA). Regulation of vascular resistance. Expressed in VSMC, pericytes, cardiomyocytes, mesangial cells, fibroblast. Activation of ETA induces CTGF (UP) in VSMC. ETA mediates the profibrotic effect of ET1 on vasculature (convergence of ET1 and TGF- $\beta$ on a common signaling pathway for collagen 1 upregulation). ETA mediates the co-mitogenic effect of ET1 (ET1 potentiates the mitogenic effect of other GFs). ETA activation mediates renal inflammation and TGF- $\beta$ production in diabetes. <b>Increased in the diabetic retina (STZ and BB rats).</b>                                                                                                                                                                                                                                                                                                                         |

| REA 230 20 Index | Representative Public ID | Entrez Gene ID | Gene Title                                     | Gene Symbol | DM vs C fold change | DM vs C posterior probability | Changes corrected by sorbinil | Changes corrected by aspirin | Summary notes (from Entrez Gene and literature)                                                                                                                                                                                                                                                                                                                                                                                              |
|------------------|--------------------------|----------------|------------------------------------------------|-------------|---------------------|-------------------------------|-------------------------------|------------------------------|----------------------------------------------------------------------------------------------------------------------------------------------------------------------------------------------------------------------------------------------------------------------------------------------------------------------------------------------------------------------------------------------------------------------------------------------|
| 1373093_at       | AI169756                 | 313729         | ERBB receptor feedback inhibitor 1             | Errfi1      | 2.14                | 0.99395                       | YES                           | NO                           | <b>Ralt, gene 33, Mig6.</b> Immediate early response gene encoding a non-kinase scaffolding adaptor protein. Physiological feedback inhibitor of EGFR and HGF/Met signaling. Induced by mitogens, stressors, hypoxia. Tumor suppressor. Activates NF- $\kappa$ B and SAPK/JNK (Mapk8/SAPK1/JNK1 is UP). Pro-apoptotic.                                                                                                                       |
| 1386879_at       | NM_031832                | 83781          | lectin, galactose binding, soluble 3           | Lgals3      | 5.10                | 0.99931                       | YES                           | NO                           | <b>Galectin 3.</b> IgE-binding lectin. Multiple extracellular and intracellular functions. Immediate early gene. Cell-cell and cell-matrix interaction. Laminin-binding. RAGE ligand. Amplifier of inflammation. Anti-apoptotic. Pro-angiogenic. Upregulated in vascular injury. <b>Upregulated in diabetes (kidney, retinal Müller cells, hippocampus) and by glucose (mesangial cell).</b>                                                 |
| 1387011_at       | NM_130741                | 170496         | lipocalin 2                                    | Lcn2        | 4.21                | 0.99947                       | NO                            | NO                           | <b>Neutrophil gelatinase-associated lipocalin (NGAL), oncogene24p3.</b> Member of the lipocalin family. Iron delivery pathway. Acute-phase response protein upregulated in inflammation. Modulates the activity of matrix MMPs (by preventing inactivation by TIMP1). Upregulated in atheroma and MI (vascular inflammation, plaque instability). <b>Upregulated in retinal Müller cells in diabetes.</b>                                    |
| 1390426_at       | BF389398                 | 25496          | Notch gene homolog 1 (Drosophila)              | Notch1      | 3.01                | 0.99998                       | NO                            | YES                          | Notch signaling pathway. Receptor for membrane bound ligands. Development/vascular development. Required in part for the TGF- $\beta$ cytotstatic response. Expressed in EC and upregulated in vascular injury (EC and SMC). Both anti-apoptotic and pro-apoptotic. Activation of NF- $\kappa$ B.                                                                                                                                            |
| 1386913_at       | NM_019358                | 54320          | podoplanin                                     | Pdpn        | 2.02                | 0.99600                       | YES                           | NO                           | Mucin-type small membrane glycoprotein. Expressed in lymphatic EC, podocytes, alveolar type I cells, and epithelial cells. Induced in HUVEC and microvascular EC by IFN $\gamma$ , IL-3, TNF- $\alpha$ . Induced by TGF- $\beta$ (tumor cells). Lymphatic development. Promotes cell adhesion, migration, and tube formation. Ectopic expression = actin reorganization and cell motility.                                                   |
| 1383290_at       | BI280343                 | 311331         | serine peptidase inhibitor, Kunitz type 1      | Spint1      | 2.00                | 0.99173                       | NO                            | YES                          | Regulator of HGF activity. Inhibits HGFA (HGF activator) = prevents HGF activation. The membrane form functions as a reservoir of HGFA at site of tissue injury = promotes local activation of HGF.                                                                                                                                                                                                                                          |
| 1367712_at       | NM_053819                | 116510         | tissue inhibitor of metalloproteinase 1        | Timp1       | 4.01                | 1.00000                       | NO                            | NO                           | Inhibitor of MMPs. Promotes cell proliferation and may have an anti-apoptotic function. Upregulated by cytokines (IL-1 $\beta$ , TNF- $\alpha$ , IFN $\gamma$ , IL-6, TGF- $\beta$ ) and hormones. Induced by TGF- $\beta$ via CTGF. Inflammatory response. Anti-angiogenic. Upregulated in vascular injury = prevents neointima formation. <b>Upregulated in diabetes (glomeruli, retinal Müller cells) and by high glucose (via CTGF).</b> |
| 1376102_at       | BI292351                 | 316516         | transmembrane BAX inhibitor motif containing 1 | Tmbim1      | 2.04                | 0.99135                       | YES                           | NO                           | <b>RECS1, responsive to centrifugal force and shear stress 1.</b> Identified as a shear stress responsive gene in EC. Expressed in EC and VSMC. Expressed in most tissues. Endosomal/ lysosomal protein. Negative regulator of aortic MMP9 production: vascular remodeling.                                                                                                                                                                  |

**Supplemental Table 6:** Gene expression profile of retinal vessels in diabetes. Differentially expressed genes related to **cell cycle**.

| REA 230 20 Index                | Representative Public ID | Entrez Gene ID   | Gene Title                                                | Gene Symbol     | DM vs C fold change | DM vs C posterior probability | Changes corrected by sorbinil | Changes corrected by aspirin | Summary notes (from Entrez Gene and literature)                                                                                                                                                                                                                                                   |
|---------------------------------|--------------------------|------------------|-----------------------------------------------------------|-----------------|---------------------|-------------------------------|-------------------------------|------------------------------|---------------------------------------------------------------------------------------------------------------------------------------------------------------------------------------------------------------------------------------------------------------------------------------------------|
| <b>CELL CYCLE PROGRESSION</b>   |                          |                  |                                                           |                 |                     |                               |                               |                              |                                                                                                                                                                                                                                                                                                   |
| 1391374_at                      | BE106930                 | 360962           | transforming, acidic coiled-coil containing protein 3     | Tacc3           | 0.29                | 0.99880                       | NO                            | YES                          | Member of the acidic coiled-coil (TACC) family = centrosomal proteins that interact with microtubules and tubulin. Involved in centrosome/mitotic spindle dynamics. TACC3 deficiency triggers p53-mediated apoptosis. May be involved in cell growth and differentiation.                         |
| 1391063_at                      | BE113443                 | 315740           | kinesin family member 23 (predicted)                      | Kif23_predicted | 0.29                | 0.99068                       | NO                            | YES                          | <b>Mitotic kinesin-like protein 1.</b> Member of the kinesin-like protein family (microtubule-dependent molecular motors that transport organelles within cells and move chromosomes during cell division). Drives microtubule movement in vitro. Cytokinesis.                                    |
| 1374565_at                      | BF282365                 | 360161           | NIMA (never in mitosis gene a)-related expressed kinase 6 | Nek6            | 2.08                | 0.99235                       | YES                           | NO                           | Serine/threonine kinase. Cell-cycle progression. Histone kinase = regulates chromatin condensation. Positive regulator of NF- $\kappa$ B.                                                                                                                                                         |
| <b>CELL CYCLE ARREST</b>        |                          |                  |                                                           |                 |                     |                               |                               |                              |                                                                                                                                                                                                                                                                                                   |
| 1369108_at                      | NM_019221                | 246334           | transformation related protein 63                         | Trp63           | 0.39                | 0.98642                       | YES                           | YES                          | Member of the p53 gene family. TA isoforms = similar to p53, induce growth arrest and apoptosis. deltaN isoforms (prevalent isoforms) = dominant negative inhibitors of p53 and TA-p63.                                                                                                           |
| 1377659_at                      | BI302005                 | 310483           | myeloid leukemia factor 1 (predicted)                     | Mlf1_predicted  | 3.17                | 0.99988                       | YES                           | NO                           | Negative regulator of cell cycle progression. Expressed in many tissues. Overexpression associated with malignant transformation. Inhibits cell-cycle progression by activating p53.                                                                                                              |
| <b>PROLIFERATION INHIBITION</b> |                          |                  |                                                           |                 |                     |                               |                               |                              |                                                                                                                                                                                                                                                                                                   |
| 1377100_at                      | AI172172                 | 304218<br>493912 | androgen-induced proliferation inhibitor (predicted)      | Aprin_predicted | 2.43                | 0.99778                       | NO                            | NO                           | Inhibitor of proliferation. Induced by androgen and vitamin D.                                                                                                                                                                                                                                    |
| 1390426_at                      | BF389398                 | 25496            | Notch gene homolog 1 (Drosophila)                         | Notch1          | 3.01                | 0.99998                       | NO                            | YES                          | Notch signaling pathway. Receptor for membrane bound ligands. Development/vascular development. Required in part for the TGF- $\beta$ cytotstatic response. Expressed in EC and upregulated in vascular injury (EC and SMC). Both anti-apoptotic and pro-apoptotic. Activation of NF- $\kappa$ B. |

**Supplemental Table 7:** Gene expression profile of retinal vessels in diabetes. Differentially expressed genes related to **apoptosis**.

| REA 230 20 Index                 | Representative Public ID | Entrez Gene ID | Gene Title                                                           | Gene Symbol     | DM vs C fold change | DM vs C posterior probability | Changes corrected by sorbinil | Changes corrected by aspirin | Summary notes (from Entrez Gene and literature)                                                                                                                                                                                                                                                                                                                                                                                     |
|----------------------------------|--------------------------|----------------|----------------------------------------------------------------------|-----------------|---------------------|-------------------------------|-------------------------------|------------------------------|-------------------------------------------------------------------------------------------------------------------------------------------------------------------------------------------------------------------------------------------------------------------------------------------------------------------------------------------------------------------------------------------------------------------------------------|
| <b>PRO-APOPTOTIC p53 PATHWAY</b> |                          |                |                                                                      |                 |                     |                               |                               |                              |                                                                                                                                                                                                                                                                                                                                                                                                                                     |
| 1369108_at                       | NM_019221                | 246334         | transformation related protein 63                                    | Trp63           | 0.39                | 0.98642                       | YES                           | YES                          | Member of the p53 gene family. TA isoforms = similar to p53, induce growth arrest and apoptosis. deltaN isoforms (prevalent isoforms) = dominant negative inhibitors of p53 and TA-p63.                                                                                                                                                                                                                                             |
| 1377659_at                       | BI302005                 | 310483         | myeloid leukemia factor 1 (predicted)                                | Myf1_pre dicted | 3.17                | 0.99988                       | YES                           | NO                           | Negative regulator of cell cycle progression. Expressed in many tissues. Overexpression associated with malignant transformation. Inhibits cell-cycle progression by activating p53.                                                                                                                                                                                                                                                |
| 1370928_at                       | BI284739                 | 65161          | LPS-induced TN factor                                                | Litaf           | 3.84                | 0.99886                       | NO                            | NO                           | Transcription factor. Mediates the LPS-dependent induction of TNF- $\alpha$ and other cytokines. Induced by LPS and p53. Activates NF- $\kappa$ B. Inhibited by salicylates.                                                                                                                                                                                                                                                        |
| 1388776_at                       | AI169176                 | 301013         | scotin                                                               | MGC946 00       | 1.98                | 0.99200                       | YES                           | NO                           | p53- and p73-dependent apoptosis. Endoplasmic reticulum. Induced and transactivated by p53 and p73. Activates NF- $\kappa$ B.                                                                                                                                                                                                                                                                                                       |
| 1381650_at                       | BM389433                 | 291314         | selenophosphate synthetase 1                                         | Sephs1          | 1.99                | 0.99092                       | YES                           | YES                          | Synthesis of selenophosphate from selenide and ATP. Selenophosphate is used to synthesize selenocysteine, which is co-translationally incorporated into selenoproteins at in-frame UGA codons. Most selenoproteins are involved in redox balance (glutathione peroxidase, thioredoxin reductase) Overexpression leads to increased cell death in response to genotoxic conditions in a p53-dependent mechanism.                     |
| 1391374_at                       | BE106930                 | 360962         | transforming, acidic coiled-coil containing protein 3                | Tacc3           | 0.29                | 0.99880                       | NO                            | YES                          | Member of the acidic coiled-coil (TACC) family = centrosomal proteins that interact with microtubules and tubulin. Involved in centrosome/mitotic spindle dynamics. TACC3 deficiency triggers p53-mediated apoptosis. May be involved in cell growth and differentiation.                                                                                                                                                           |
| 1372564_at                       | AI411375                 | 304063         | v-ets erythroblastosis virus E26 oncogene homolog 2 (avian) (mapped) | Ets2            | 2.37                | 0.99800                       | YES                           | NO                           | Transcription factor member of the ETS-domain transcription factor family. induced by oxidative stress; endothelial morphogenesis. Pro-apoptotic via activation of p53 pathway.                                                                                                                                                                                                                                                     |
| <b>PRO-APOPTOTIC</b>             |                          |                |                                                                      |                 |                     |                               |                               |                              |                                                                                                                                                                                                                                                                                                                                                                                                                                     |
| 1397221_s_at                     | BE108106                 | 246097         | Tumor necrosis factor receptor superfamily, member 6                 | Tnfrsf6         | 2.60                | 1.00000                       | NO                            | NO                           | <b>FAS, CD95 antigen.</b> Member of the TNF-receptor superfamily. Induces apoptosis. EC are usually resistant, while VSMC are susceptible to FAS-induced apoptosis. Induced by cytokines (IFN $\gamma$ , TNF- $\alpha$ , IL-1 $\beta$ in EC and VSMC; TGF $\beta$ in gastric carcinoma cells). Upregulated in vascular injury. FAS/FASL deficiency increases neovascularization. <b>Upregulated in retinal vessels in diabetes.</b> |
| 1371131_a_at                     | U30789                   | 117514         | Thioredoxin interacting protein                                      | Txnip           | 2.66                | 0.99899                       | YES                           | NO                           | <b>VDUP1.</b> Negative regulator of thioredoxin. Upregulation promotes oxidative stress. Pro-apoptotic. Upregulated by vitamin D3 and TGF- $\beta$ . <b>Upregulated by high glucose (glucose responsive elements in the promoter). Induced in diabetes (aorta, kidney, islets).</b>                                                                                                                                                 |
| 1371774_at                       | AA893220                 | 302642         | spermidine/spermin e N1-acetyl transferase (mapped)                  | Sat             | 2.09                | 0.99800                       | YES                           | NO                           | Rate-limiting enzyme of polyamine catabolism. Overexpression leads to generation of H <sub>2</sub> O <sub>2</sub> and oxidative stress, inhibition of cell growth and apoptosis, and increased integrin-mediated cell migration. Upregulated in ischemia-reperfusion and by H <sub>2</sub> O <sub>2</sub> (kidney, liver)                                                                                                           |
| 1373093_at                       | AI169756                 | 313729         | ERBB receptor feedback inhibitor 1                                   | Errfi1          | 2.14                | 0.99395                       | YES                           | NO                           | <b>Ralt, gene 33, Mig6.</b> Immediate early response gene encoding a non-kinase scaffolding adaptor protein. Physiological feedback inhibitor of EGFR and HGF/Met signaling. Induced by mitogens, stressors, hypoxia. Tumor suppressor. Activates NF- $\kappa$ B and SAPK/JNK (Mapk8/SAPK1/JNK1 is UP). Pro-apoptotic.                                                                                                              |
| 1392418_at                       | BE105603                 | 116554         | Mitogen-activated protein kinase 8                                   | Mapk8           | 2.02                | 0.99125                       | YES                           | NO                           | <b>c-jun N-terminal kinase 1, JNK1, SAPK1.</b> Member of the MAP kinase family. Activated by various cell stimuli (cytokines, stressors) mediates immediate-early gene expression. Stress-induced apoptosis. Required for TNF- $\alpha$ induced apoptosis. Survival signaling in some cases. <b>Activated by high glucose</b> and hyperosmolarity in VSMC and EC.                                                                   |



| REA 230 20 Index      | Representative Public ID | Entrez Gene ID | Gene Title                                                                       | Gene Symbol | DM vs C fold change | DM vs C posterior probability | Changes corrected by sorbinil | Changes corrected by aspirin | Summary notes (from Entrez Gene and literature)                                                                                                                                                                                                                                                                                                                                                                                     |
|-----------------------|--------------------------|----------------|----------------------------------------------------------------------------------|-------------|---------------------|-------------------------------|-------------------------------|------------------------------|-------------------------------------------------------------------------------------------------------------------------------------------------------------------------------------------------------------------------------------------------------------------------------------------------------------------------------------------------------------------------------------------------------------------------------------|
| 1387005_at            | NM_017320                | 50654          | cathepsin S                                                                      | Ctss        | 2.10                | 0.99900                       | YES                           | NO                           | Lysosomal cysteine protease. Elastolytic and collagenolytic activity. Degradation of proteoglycans. Upregulated by IFN $\gamma$ . Mediates interferon-induced apoptosis. MHCII antigen presentation (degradation of the MHC invariant chain CD74). Upregulated in EC by cytokine/growth factors. Pro-angiogenic. Upregulated in atheroma and vascular injury. <b>Serum levels increased in DM with atherosclerosis and obesity.</b> |
| 1370694_at            | AB020967                 | 246273         | tribbles homolog 3                                                               | Trib3       | 0.49                | 0.99200                       | NO                            | YES                          | Negative regulator of NF- $\kappa$ B and Akt1. Induced by NF- $\kappa$ B, hypoxia, and ER-stress. ER-stress-induced apoptosis. Sensitizes cells to TNF-induced apoptosis. <b>Upregulated in diabetes (liver db/db mice).</b>                                                                                                                                                                                                        |
| 1369959_at            | NM_017172                | 29344          | zinc finger protein 36, C3H type-like 1                                          | Zfp36l1     | 2.03                | 0.99700                       | YES                           | YES                          | Member of the TIS11 family of early response genes. Regulates the response to growth factors. Control of both basal and ACTH-induced VEGF mRNA expression by decreasing VEGF mRNA stability. Pro-apoptotic.                                                                                                                                                                                                                         |
| <b>ANTI-APOPTOTIC</b> |                          |                |                                                                                  |             |                     |                               |                               |                              |                                                                                                                                                                                                                                                                                                                                                                                                                                     |
| 1370048_at            | NM_053936                | 116744         | endothelial differentiation, lysophosphatidic acid G-protein-coupled receptor, 2 | Edg2        | 0.26                | 0.98670                       | YES                           | YES                          | G-protein coupled receptor for lysophosphatidic acid (LPA). LPA is a growth factor that regulates EC and VSMC functions (promotes survival, proliferation, migration, and increases permeability). Anti-apoptotic.                                                                                                                                                                                                                  |
| 1374904_at            | AI175048                 | 114634         | sine oculis homeobox homolog 1 (Drosophila)                                      | Six1        | 0.26                | 0.99300                       | YES                           | YES                          | Transcription factor. Cell survival and proliferation. Required for Pax3 expression in myogenesis (and vice versa).                                                                                                                                                                                                                                                                                                                 |
| 1397478_at            | AI030187                 | 114766         | Prohibitin 2                                                                     | Phb2        | 2.94                | 0.99725                       | YES                           | NO                           | Anti-apoptotic (via interaction and regulation of Hax1 in mitochondria). Maintenance of mitochondrial morphology. Translocates to the nucleus: transcriptional repressor (Repressor of estrogen receptor activity). Inhibits myogenic differentiation (via interaction with Akt2).                                                                                                                                                  |
| 1367725_at            | NM_022602                | 64534          | serine/threonine-protein kinase pim-3                                            | Pim3        | 2.49                | 0.99685                       | NO                            | YES                          | Member of the proto-oncogene Pim family = downstream effectors of cytokines/growth factors signaling pathways. Aberrant expression promotes cell proliferation and prevents apoptosis. Two other members of this family --Pim1 and Pim2-- are induced by cytokines/growth factors via STAT3 and prevent cytokine-induced apoptosis.                                                                                                 |

**Supplemental Table 8:** Gene expression profile of retinal vessels in diabetes. Differentially expressed genes related to **other functions and of unknown function**.

| REA 230 20 Index      | Representative Public ID | Entrez Gene | Gene Title                                                            | Gene Symbol     | DM vs C fold change | DM vs C posterior probability | Changes corrected by sorbinil | Changes corrected by aspirin | Summary notes (from Entrez Gene and literature)                                                                                                                                                                                                                                                                                             |
|-----------------------|--------------------------|-------------|-----------------------------------------------------------------------|-----------------|---------------------|-------------------------------|-------------------------------|------------------------------|---------------------------------------------------------------------------------------------------------------------------------------------------------------------------------------------------------------------------------------------------------------------------------------------------------------------------------------------|
| <b>METABOLISM</b>     |                          |             |                                                                       |                 |                     |                               |                               |                              |                                                                                                                                                                                                                                                                                                                                             |
| 1375944_at            | AA849497                 | 311569      | acyl-CoA synthetase short-chain family member 2 (predicted)           | Acss2_predicted | 2.14                | 0.99200                       | NO                            | YES                          | Cytosolic enzyme that catalyzes the activation of acetate for use in lipid synthesis and energy generation. Expression regulated by sterol regulatory element-binding proteins, transcription factors that activate genes required for the synthesis of cholesterol and unsaturated fatty acids. Activity regulated by SIRT (deacetylation) |
| 1390383_at            | BI285616                 | 298199      | Adipose differentiation related protein                               | Adfp            | 2.10                | 0.99262                       | YES                           | NO                           | Adipophilin. Biogenesis of lipid droplets. Adipocytes differentiation. Ubiquitously expressed. Upregulated in atheroma (intima). <b>Upregulated in diabetes (kidney).</b>                                                                                                                                                                   |
| 1390850_at            | AA874941                 | 298199      | Adipose differentiation related protein                               | Adfp            | 1.98                | 0.99800                       | YES                           | NO                           | Adipophilin. Biogenesis of lipid droplets. Adipocytes differentiation. Ubiquitously expressed. Upregulated in atheroma (intima). <b>Upregulated in diabetes (kidney).</b>                                                                                                                                                                   |
| 1388480_at            | AI412863                 | 288707      | glycolipid transfer protein (predicted)                               | Gltpr_predicted | 3.01                | 0.99900                       | NO                            | NO                           | Glycosphingolipids and glyceroglycolipids transport across membranes. It is thought to be a cytoplasmic protein.                                                                                                                                                                                                                            |
| 1383413_at            | AW531481                 | 301073      | Gup1, glycerol uptake/transporter homolog (yeast) (predicted)         | Gup1_predicted  | 0.48                | 0.98641                       | NO                            | NO                           | In yeasts involved in remodeling of the GPI-anchor lipids. No data on mammals homologs. The human and mouse gene name is: HHATL, hedgehog acyltransferase-like [HHATL, C3orf3, MBOAT3, OACT3]                                                                                                                                               |
| 1386979_at            | NM_133395                | 170907      | developmentally regulated protein TPO1                                | Tpo1            | 2.50                | 0.99700                       | NO                            | NO                           | Serine incorporator 5. Serine and sphingolipid synthesis. Human homolog (C5orf12) expressed in many tissues. Endoplasmic reticulum.                                                                                                                                                                                                         |
| 1389791_at            | AI179775                 | 306619      | ceroid-lipofuscinosis, neuronal 8                                     | Cln8            | 1.99                | 0.99700                       | NO                            | YES                          | Motor neuron degeneration. Mutation leads to neuronal ceroid-lipofuscinosis. Endoplasmic reticulum.                                                                                                                                                                                                                                         |
| 1379334_at            | BF547086                 | 309312      | Glycine decarboxylase (predicted)                                     | Gldc_predicted  | 2.04                | 0.99540                       | YES                           | NO                           | Component of the glycine decarboxylase system (mitochondrial).                                                                                                                                                                                                                                                                              |
| 1375426_a_at          | BI295086                 | 171137      | KH-type splicing regulatory protein                                   | Khsrp           | 2.01                | 0.98700                       | YES                           | NO                           | MAP2 RNA trans-acting protein MARTA1. mRNA destabilization factor. Nuclear-cytoplasmic mRNA targeting. Interacts with TNF.                                                                                                                                                                                                                  |
| 1374621_at            | AA892987                 | 361420      | TATA box binding protein (Tbp)-associated factor, RNA polymerase I, C | Taf1c           | 2.28                | 0.98969                       | NO                            | YES                          | This gene encodes the largest SL1-specific TAF (TBP-associated factors required for initiation of transcription by RNA polymerase I). P53 binds to SL1 and inhibits its function. [SL1, 110kD subunit; TBP-associated factor 1C; transcription factor SL1, transcription factor TAFI95]                                                     |
| <b>OTHER FUNCTION</b> |                          |             |                                                                       |                 |                     |                               |                               |                              |                                                                                                                                                                                                                                                                                                                                             |
| 1371245_a_at          | BI287300                 | 689064      | beta-globin                                                           | LOC689064       | 2.16                | 0.98627                       | NO                            | YES                          | Homolog of human hemoglobin delta and mouse hemoglobin $\beta$ adult major chain.                                                                                                                                                                                                                                                           |
| 1368353_at            | NM_017009                | 24387       | glial fibrillary acidic protein                                       | Gfap            | 5.84                | 0.99700                       | YES                           | NO                           | Intermediate filament protein. Upregulated in glial reactivity. <b>Upregulated in retinal Müller cells in diabetes.</b>                                                                                                                                                                                                                     |
| 1368951_at            | NM_022797                | 24412       | glutamate receptor, ionotropic, N-methyl D-aspartate 2D               | Grin2d          | 2.10                | 0.99700                       | YES                           | YES                          | N-methyl-D-aspartate receptor subunit. Myogenic differentiation; bind to microtubule MAP2. NMDA receptors are expressed also in EC. [NMDAR2D, NR2D].                                                                                                                                                                                        |
| 1380048_at            | BF401725                 | 171297      | Neurologin 3                                                          | Nlgn3           | 1.95                | 0.98724                       | YES                           | NO                           | Neuronal cell surface protein that binds neuroligins. Required for proper synapse maturation.                                                                                                                                                                                                                                               |

| REA 230 20 Index        | Representative Public ID | Entrez Gene | Gene Title                                                                      | Gene Symbol       | DM vs C fold change | DM vs C posterior probability | Changes corrected by sorbinil | Changes corrected by aspirin | Summary notes (from Entrez Gene and literature)                                                                                                                                                                                                          |
|-------------------------|--------------------------|-------------|---------------------------------------------------------------------------------|-------------------|---------------------|-------------------------------|-------------------------------|------------------------------|----------------------------------------------------------------------------------------------------------------------------------------------------------------------------------------------------------------------------------------------------------|
| 1385752_at              | BF394136                 | 299016      | neuronal PAS domain protein 3 (predicted)                                       | Npas3_predicted   | 2.40                | 1.00000                       | NO                            | NO                           | Brain-enriched basic helix-loop-helix (bHLH) PAS domain transcription factor. Regulates FGF signaling in the dentate gyrus of mammalian brain by controlling expression of the FGFR1, and in turn also controls neurogenesis emanating from this region. |
| 1392449_at              | BI282152                 | 362412      | RAD18 homolog (S. cerevisiae) (predicted)                                       | Rad18_predicted   | 0.39                | 0.99893                       | NO                            | YES                          | Postreplication DNA repair.                                                                                                                                                                                                                              |
| 1370973_at              | BF285019                 | 64155       | sodium channel, voltage-gated, type VII, alpha                                  | Scn7a             | 4.52                | 0.99998                       | NO                            | NO                           | Nav2, Nax. Central control of salt homeostasis. Local control of sodium levels. VSMC contractility. <b>Upregulated in retinal Müller cells in diabetes.</b>                                                                                              |
| 1378047_at              | AA901337                 | 314711      | Spi-C transcription factor (Spi-1/PU.1 related) (predicted)                     | Spic_predicted    | 0.36                | 0.99488                       | NO                            | YES                          | Transcription factor. Positive/negative transcriptional regulator of B-lymphocyte differentiation. Upregulated in pulmonary epithelial cells in <i>lal</i> <sup>-/-</sup> mice (lung pathology/emphysema model).                                         |
| <b>UNKNOWN FUNCTION</b> |                          |             |                                                                                 |                   |                     |                               |                               |                              |                                                                                                                                                                                                                                                          |
| 1385064_at              | BM384729                 | 298483      | L-amino acid oxidase 1 (predicted)                                              | Lao1_predicted    | 0.40                | 0.99565                       | NO                            | YES                          | Aminoacid catabolism. No human homolog. In the mouse expressed in mammary epithelium. Specific function unknown.                                                                                                                                         |
| 1384831_at              | AI233155                 | 313089      | solute carrier family 7, (cationic amino acid transporter, y+ system) member 13 | Slc7a13           | 0.45                | 0.99400                       | YES                           | YES                          | Aspartate/glutamate transporter 1. Cationic amino acid transporter. Specific function unknown.                                                                                                                                                           |
| 1393217_at              | BF282804                 | 289453      | ATP-binding cassette, sub-family G (WHITE), member 3                            | Abcg3             | 2.45                | 0.99781                       | YES                           | NO                           | Member of the ATP-binding cassette (ABC) transporter. Specific function unknown.                                                                                                                                                                         |
| 1376287_at              | BM389585                 | 362701      | calpain 13                                                                      | Capn13            | 0.41                | 0.99328                       | YES                           | YES                          | Putative calpain large subunit protein. Function unknown.                                                                                                                                                                                                |
| 1388659_at              | BI295783                 | 260416      | calcium regulated heat stable protein 1                                         | Carhsp1           | 2.17                | 0.98746                       | YES                           | NO                           | Substrate of calcineurin and of several kinases including p90RSK. Specific function unknown.                                                                                                                                                             |
| 1387349_at              | NM_013028                | 25546       | short stature homeobox 2                                                        | Shox2             | 0.31                | 0.99358                       | YES                           | YES                          | Transcription factor of the homeo box family. Development. Function unknown.                                                                                                                                                                             |
| 1392677_at              | AA924705                 | 315882      | Zic family member 4 (predicted)                                                 | Zic4_predicted    | 0.37                | 0.99888                       | NO                            | YES                          | Transcription factor of the ZIC family of C2H2-type. Development. Function unknown.                                                                                                                                                                      |
| 1372419_at              | BG380296                 | 361565      | vaccinia related kinase 3                                                       | Vrk3              | 1.97                | 0.98600                       | YES                           | NO                           | Nuclear protein. Lacks phosphorylation activity but retains its substrate binding capability. Function unknown.                                                                                                                                          |
| 1385199_a_at            | AI073196                 | 307956      | RNA binding motif protein 34                                                    | Rbm34             | 1.80                | 0.98871                       | YES                           | NO                           | Contains an RNA recognition motif. Function unknown. <b>NOTE: THIS PROBE SET IS UP IN DM AND DM+ASA WHILE IT IS DOWN IN DM+SORB</b>                                                                                                                      |
| 1387995_a_at            | BI285494                 | 361673      | interferon induced transmembrane protein 3                                      | Ifitm3            | 2.79                | 0.99941                       | NO                            | NO                           | Fragilis. Germ cells development. Epithelial cell differentiation. Specific function unknown. <b>Upregulated in retinal Müller cells in diabetes.</b>                                                                                                    |
| 1394200_at              | BF410146                 | 60460       | heat shock 70kDa protein 2                                                      | Hspa2             | 2.81                | 1.00000                       | NO                            | NO                           | Testis specific hst70. Constitutively expressed in most tissues with high levels in testis and skeletal muscle. Required for spermatogenesis. Specific function unknown.                                                                                 |
| 1368840_at              | NM_134390                | 171411      | LR8 protein                                                                     | Lr8               | 2.92                | 1.00000                       | NO                            | NO                           | TORID (tolerance-related and induced transcript). Function unknown                                                                                                                                                                                       |
| 1382387_at              | BF288508                 | 309135      | Transmembrane protein 16A (predicted)                                           | Tmem16a_predicted | 1.94                | 0.99712                       | YES                           | NO                           | Amplified in various cancers. Function unknown.                                                                                                                                                                                                          |
| 1387276_at              | NM_021584                |             | Ania4                                                                           | Ania4             | 3.34                | 0.99995                       | NO                            | NO                           | Function unknown. <b>Upregulated in retinal Müller cells in diabetes.</b>                                                                                                                                                                                |
| 1372310_at              | AI227941                 | 364879      | isochorismatase domain containing 1                                             | Isoc1             | 2.11                | 0.99500                       | NO                            | YES                          | Down-regulated in nephrectomized rat kidney (gene #1). Function unknown                                                                                                                                                                                  |

| REA 230 20 Index | Representative Public ID | Entrez Gene | Gene Title                                     | Gene Symbol     | DM vs C fold change | DM vs C posterior probability | Changes corrected by sorbinil | Changes corrected by aspirin | Summary notes (from Entrez Gene and literature) |
|------------------|--------------------------|-------------|------------------------------------------------|-----------------|---------------------|-------------------------------|-------------------------------|------------------------------|-------------------------------------------------|
| 1388127_at       | AI170346                 | 266761      | cytochrome P450-like protein                   | Loc266761       | 2.21                | 0.99704                       | YES                           | NO                           | Function unknown.                               |
| 1370389_at       | AB036421                 | 192179      | glycoprotein m6b                               | Gpm6b           | 2.10                | 0.99900                       | YES                           | NO                           | Function unknown.                               |
| 1374693_at       | BM388613                 | 315760      | poly (ADP-ribose) polymerase family, member 16 | Parp16          | 2.24                | 0.99771                       | NO                            | NO                           | Function unknown                                |
| 1370659_at       | AF016179                 | 286981      | putative pheromone receptor (Go-VN2)           | LOC286981       | 0.39                | 0.99266                       | NO                            | YES                          | Function unknown.                               |
| 1396631_at       | BF410419                 | 362768      | tetratricopeptide repeat domain 7B (predicted) | Ttc7b_predicted | 0.47                | 0.99268                       | YES                           | YES                          | Function unknown                                |
| 1371968_at       | AI013781                 | 362884      | transmembrane BAX inhibitor motif containing 4 | Tmbim4          | 2.02                | 0.99600                       | NO                            | YES                          | Function unknown                                |
| 1373938_at       | BF284753                 | 360497      | WD repeat domain 24                            | Wdr24           | 2.40                | 0.99536                       | YES                           | NO                           | Function unknown                                |

**Supplemental Table 9:** Genes differentially expressed in diabetic retinal vessels: comparison to diabetic retinal Müller cells.

| GeneChip REA230 2.0 probe set ID         | Gene Title                                                                                                 | Gene Symbol        | Vessels vs C  | DM | GeneChip RGU34A probe set ID      | Müller cells DM vs C | Functional Categories                                                      |
|------------------------------------------|------------------------------------------------------------------------------------------------------------|--------------------|---------------|----|-----------------------------------|----------------------|----------------------------------------------------------------------------|
| 1379586_at                               | A disintegrin-like and metallopeptidase (reprolysin type) with thrombospondin type 1 motif, 19 (predicted) | Adamts19_predicted | Upregulated   |    | not in RGU34A                     | ---                  | matrix and vascular remodeling                                             |
| 1368223_at                               | a disintegrin-like and metallopeptidase (reprolysin type) with thrombospondin type 1 motif, 1              | Adamts1            | Upregulated   |    | not in RGU34A                     | ---                  | matrix and vascular remodeling                                             |
| 1385397_at                               | Ab1-219                                                                                                    | LOC499991          | Upregulated   |    | not in RGU34A                     | ---                  | inflammation/response to injury                                            |
| 1375944_at                               | acyl-CoA synthetase short-chain family member 2 (predicted)                                                | Acss2_predicted    | Upregulated   |    | not in RGU34A                     | ---                  | other/unknown function                                                     |
| 1390383_at<br>1390850_at                 | Adipose differentiation related protein                                                                    | Adfp               | Upregulated   |    | rc_AA893280_at<br>rc_AA874941_at  | not detected         | other/unknown function                                                     |
| 1367794_at                               | alpha-2-macroglobulin                                                                                      | A2m                | Upregulated   |    | M23566exon_s_at<br>rc_AA900582_at | Upregulated          | inflammation/response to injury                                            |
| 1377100_at                               | androgen-induced proliferation inhibitor (predicted)                                                       | Aprin_predicted    | Upregulated   |    | not in RGU34A                     | ---                  | cell cycle                                                                 |
| 1387276_at                               | Ania4                                                                                                      | Ania4              | Upregulated   |    | AF030089UTR#1_at                  | Upregulated          | other/unknown function                                                     |
| 1392250_at                               | Annexin A2                                                                                                 | Anxa2              | Downregulated |    | L13039_s_at                       | no change            | matrix and vascular remodeling                                             |
| 1393217_at                               | ATP-binding cassette, sub-family G (WHITE), member 3                                                       | Abcg3              | Upregulated   |    | not in RGU34A                     | ---                  | other/unknown function                                                     |
| 1370913_at                               | Best5 protein                                                                                              | Best5              | Upregulated   |    | Y07704_g_at                       | Upregulated          | inflammation/response to injury                                            |
| 1370907_at                               | Beta galactoside alpha 2,6 sialyltransferase 1                                                             | St6gal1            | Upregulated   |    | M83143_at<br>M83143_g_at          | no change            | matrix and vascular remodeling, inflammation/response to injury            |
| 1367595_s_at                             | beta-2 microglobulin                                                                                       | B2m                | Upregulated   |    | rc_AI170268_at                    | no change            | inflammation/response to injury                                            |
| 1371245_a_at                             | beta-globin                                                                                                | LOC689064          | Upregulated   |    | not in RGU34A                     | ---                  | other/unknown function                                                     |
| 1389095_at                               | biregional cell adhesion molecule-related/down-regulated by oncogenes (Cdon) binding protein (predicted)   | Boc_predicted      | Upregulated   |    | rc_AI639199_at                    | not detected         | matrix and vascular remodeling                                             |
| 1390398_at                               | Bone morphogenetic protein receptor, type 1A                                                               | Bmpr1a             | Upregulated   |    | S75359_s_at                       | no change            | TGFbeta/BMPs pathway                                                       |
| 1388659_at                               | calcium regulated heat stable protein 1                                                                    | Carhsp1            | Upregulated   |    | not in RGU34A                     | ---                  | other/unknown function                                                     |
| 1376287_at                               | calpain 13                                                                                                 | Capn13             | Downregulated |    | not in RGU34A                     | ---                  | other/unknown function                                                     |
| 1379300_at                               | carbohydrate sulfotransferase 2 (predicted)                                                                | Chst2_predicted    | Upregulated   |    | not in RGU34A                     | ---                  | matrix and vascular remodeling                                             |
| 1374778_at                               | cathepsin C                                                                                                | Ctsc               | Upregulated   |    | D90404_at D90404_g_at             | no change            | matrix and vascular remodeling                                             |
| 1387005_at                               | cathepsin S                                                                                                | Ctss               | Upregulated   |    | L03201_at                         | no change            | matrix and vascular remodeling, inflammation/response to injury, apoptosis |
| 1368593_at                               | CD1d1 antigen                                                                                              | Cd1d1              | Upregulated   |    | D26439_at                         | no change            | inflammation/response to injury                                            |
| 1368921_a_at                             | CD44 antigen                                                                                               | Cd44               | Upregulated   |    | M61875_s_at                       | no change            | TGFbeta/BMPs pathway, matrix and vascular remodeling                       |
| 1367679_at                               | CD74 antigen (invariant polypeptide of major histocompatibility complex, class II antigen-associated)      | Cd74               | Upregulated   |    | X13044_at                         | Upregulated          | inflammation/response to injury                                            |
| 1371499_at                               | CD9 antigen                                                                                                | Cd9                | Upregulated   |    | X76489cds_g_at                    | no change            | matrix and vascular remodeling                                             |
| 1389791_at                               | ceroid-lipofuscinosis, neuronal 8                                                                          | Cln8               | Upregulated   |    | not in RGU34A                     | ---                  | other/unknown function                                                     |
| 1368418_a_at<br>1368419_at<br>1368420_at | ceruloplasmin                                                                                              | Cp                 | Upregulated   |    | L33869_at                         | Upregulated          | inflammation/response to injury, oxidative stress                          |
| 1392171_at                               | chitinase 3-like 1                                                                                         | Chi3l1             | Upregulated   |    | not in RGU34A                     | ---                  | inflammation/response to injury, matrix and vascular remodeling            |
| 1387893_at                               | complement component 1, s subcomponent                                                                     | C1s                | Upregulated   |    | D88250_at                         | Upregulated          | inflammation/response to injury                                            |
| 1383391_a_at                             | complement component 2                                                                                     | C2                 | Upregulated   |    | not in RGU34A                     | ---                  | inflammation/response to injury                                            |

The TGF- $\beta$  pathway is a common target of drugs that prevent experimental diabetic retinopathy

Supplemental Table 9

Page 1 of 4

| GeneChip REA230 2.0 probe set ID | Gene Title                                                                       | Gene Symbol      | Vessels DM vs C | GeneChip RGU34A probe set ID | Müller cells DM vs C | Functional Categories                                           |
|----------------------------------|----------------------------------------------------------------------------------|------------------|-----------------|------------------------------|----------------------|-----------------------------------------------------------------|
| 1368000_at                       | complement component 3                                                           | C3               | Upregulated     | M29866_s_at X52477_at        | Upregulated          | inflammation/response to injury                                 |
| 1389470_at                       | Complement factor B                                                              | Cfb              | Upregulated     | rc_AI639117_s_at             | Upregulated          | inflammation/response to injury                                 |
| 1367631_at                       | connective tissue growth factor                                                  | Ctgf             | Upregulated     | not in RGU34A                | ---                  | TGFbeta/BMPs pathway, matrix and vascular remodeling            |
| 1369321_s_at                     | cytochrome c, testis                                                             | Cyct             | Downregulated   | M20623_at                    | not detected         | oxidative stress                                                |
| 1387328_at                       | Cytochrome P450, subfamily IIC (mephenytoin 4-hydroxylase)                       | Cyp2c            | Upregulated     | J02657_s_at M18363cds_s_at   | not detected         | oxidative stress                                                |
| 1388127_at                       | cytochrome P450-like protein                                                     | Loc266761        | Upregulated     | not in RGU34A                | ---                  | other/unknown function                                          |
| 1375936_at                       | desmocollin 2                                                                    | Dsc2             | Upregulated     | not in RGU34A                | ---                  | matrix and vascular remodeling                                  |
| 1386979_at                       | developmentally regulated protein TPO1                                           | Tpo1             | Upregulated     | rc_AI012275_at               | no change            | other/unknown function                                          |
| 1371430_at                       | dystroglycan 1                                                                   | Dag1             | Upregulated     | not in RGU34A                | ---                  | matrix and vascular remodeling                                  |
| 1389617_at                       | ELK3, member of ETS oncogene family (predicted)                                  | Elk3_predicted   | Upregulated     | not in RGU34A                | ---                  | TGFbeta/BMPs pathway                                            |
| 1370048_at                       | endothelial differentiation, lysophosphatidic acid G-protein-coupled receptor, 2 | Edg2             | Downregulated   | rc_AA848831_at               | not detected         | apoptosis                                                       |
| 1393067_at                       | endothelial-specific receptor tyrosine kinase                                    | Tek              | Upregulated     | not in RGU34A                | ---                  | matrix and vascular remodeling                                  |
| 1383641_at                       | endothelin receptor type A                                                       | Ednra            | Upregulated     | M60786_at                    | not detected         | matrix and vascular remodeling                                  |
| 1373093_at                       | ERBB receptor feedback inhibitor 1                                               | Errfi1           | Upregulated     | rc_AII69756_s_at             | no change            | matrix and vascular remodeling, apoptosis                       |
| 1370256_at                       | frizzled homolog 1 (Drosophila)                                                  | Fzd1             | Upregulated     | L02529_at                    | no change            | TGF-beta/BMPs pathway                                           |
| 1368353_at                       | glial fibrillary acidic protein                                                  | Gfap             | Upregulated     | AF028784mRNA#1_s_at          | Upregulated          | other/unknown function                                          |
| 1368951_at                       | glutamate receptor, ionotropic, N-methyl D-aspartate 2D                          | Grin2d           | Upregulated     | D13213_s_at U08260_at        | not detected         | other/unknown function                                          |
| 1383546_at                       | glycerophosphodiester phosphodiesterase domain containing 2 (predicted)          | Gdpd2_predicted  | Upregulated     | not in RGU34A                | ---                  | matrix and vascular remodeling                                  |
| 1379334_at                       | Glycine decarboxylase (predicted)                                                | Gldc_predicted   | Upregulated     | not in RGU34A                | ---                  | other/unknown function                                          |
| 1388480_at                       | glycolipid transfer protein (predicted)                                          | Gltpt_predicted  | Upregulated     | not in RGU34A                | ---                  | other/unknown function                                          |
| 1370389_at                       | glycoprotein m6b                                                                 | Gpm6b            | Upregulated     | not in RGU34A                | ---                  | other/unknown function                                          |
| 1392888_at                       | glypican 4                                                                       | Gpc4             | Upregulated     | not in RGU34A                | ---                  | matrix and vascular remodeling                                  |
| 1383413_at                       | Gup1, glycerol uptake/transporter homolog (yeast) (predicted)                    | Gup1_predicted   | Downregulated   | not in RGU34A                | ---                  | other/unknown function                                          |
| 1394200_at                       | heat shock 70kDa protein 2                                                       | Hspa2            | Upregulated     | X15705cds_at                 | no change            | other/unknown function                                          |
| 1380442_at                       | homeo box C8                                                                     | Hoxc8            | Downregulated   | M37568cds_at                 | not detected         | TGFbeta/BMPs pathway                                            |
| 1374601_at                       | interferon gamma receptor 2 (predicted)                                          | Ifngr2_predicted | Upregulated     | not in RGU34A                | ---                  | TGF-beta/BMPs pathway, inflammation/response to injury          |
| 1387995_a_at                     | interferon induced transmembrane protein 3                                       | Ifitm3           | Upregulated     | X61381cds_s_at               | Upregulated          | other/unknown function                                          |
| 1386987_at                       | interleukin 6 receptor, alpha                                                    | Il6ra            | Upregulated     | M58587_at                    | no change            | inflammation/response to injury                                 |
| 1372310_at                       | isochorismatase domain containing 1                                              | Isoc1            | Upregulated     | not in RGU34A                | ---                  | other/unknown function                                          |
| 1375426_a_at                     | KH-type splicing regulatory protein                                              | Khsrp            | Upregulated     | not in RGU34A                | ---                  | other/unknown function                                          |
| 1391063_at                       | kinesin family member 23 (predicted)                                             | Kif23_predicted  | Downregulated   | not in RGU34A                | ---                  | cell cycle                                                      |
| 1391022_at                       | laminin, beta 3                                                                  | Lamb3            | Downregulated   | not in RGU34A                | ---                  | matrix and vascular remodeling                                  |
| 1385064_at                       | L-amino acid oxidase 1 (predicted)                                               | Lao1_predicted   | Downregulated   | not in RGU34A                | ---                  | other/unknown function                                          |
| 1386879_at                       | lectin, galactose binding, soluble 3                                             | Lgals3           | Upregulated     | J02962_at                    | Upregulated          | matrix and vascular remodeling, inflammation/response to injury |
| 1387011_at                       | lipocalin 2                                                                      | Lcn2             | Upregulated     | rc_AA946503_at               | Upregulated          | inflammation/response to injury, matrix and vascular remodeling |
| 1370928_at                       | LPS-induced TN factor                                                            | Litaf            | Upregulated     | U53184_at                    | no change            | apoptosis                                                       |

| GeneChip REA230 2.0 probe set ID | Gene Title                                                   | Gene Symbol     | Vessels vs C  | DM | GeneChip RGU34A probe set ID | Müller cells DM vs C | Functional Categories                                                                 |
|----------------------------------|--------------------------------------------------------------|-----------------|---------------|----|------------------------------|----------------------|---------------------------------------------------------------------------------------|
| 1368840_at                       | LR8 protein                                                  | Lr8             | Upregulated   |    | not in RGU34A                | ---                  | other/unknown function                                                                |
| 1368963_at                       | Max interacting protein 1                                    | Mxi1            | Upregulated   |    | AF003008_at                  | not detected         | TGFbeta/BMPs pathway                                                                  |
| 1385433_at                       | metastasis suppressor 1 (predicted)                          | Mtss1_predicted | Downregulated |    | not in RGU34A                | ---                  | matrix and vascular remodeling                                                        |
| 1392418_at                       | Mitogen-activated protein kinase 8                           | Mapk8           | Upregulated   |    | L27129_at                    | not detected         | apoptosis                                                                             |
| 1377659_at                       | myeloid leukemia factor 1 (predicted)                        | Mlf1_predicted  | Upregulated   |    | rc_AA800632_at               | not detected         | apoptosis, cell cycle                                                                 |
| 1380048_at                       | Neuroigin 3                                                  | Nlgn3           | Upregulated   |    | U41663_at                    | not detected         | other/unknown function                                                                |
| 1385752_at                       | neuronal PAS domain protein 3 (predicted)                    | Npas3_predicted | Upregulated   |    | not in RGU34A                | ---                  | other/unknown function                                                                |
| 1374565_at                       | NIMA (never in mitosis gene a)-related expressed kinase 6    | Nek6            | Upregulated   |    | not in RGU34A                | ---                  | cell cycle                                                                            |
| 1390426_at                       | Notch gene homolog 1 (Drosophila)                            | Notch1          | Upregulated   |    | X57405_at X57405_g_at        | no change            | TGFbeta/BMPs pathway, matrix and vascular remodeling, cell cycle                      |
| 1380638_at                       | nuclear receptor coactivator 3                               | Ncoa3           | Upregulated   |    | not in RGU34A                | ---                  | TGFbeta/BMPs pathway                                                                  |
| 1387568_at                       | paired-Ig-like receptor B                                    | Pirb            | Downregulated |    | not in RGU34A                | ---                  | inflammation/response to injury, matrix and vascular remodeling                       |
| 1373911_at                       | periostin, osteoblast specific factor (predicted)            | Postn_predicted | Upregulated   |    | rc_AA894092_at               | no change            | TGFbeta/BMPs pathway, matrix and vascular remodeling                                  |
| 1386913_at                       | podoplanin                                                   | Pdpn            | Upregulated   |    | U92081mRNA_s_at              | no change            | TGFbeta/BMPs pathway, matrix and vascular remodeling, inflammation/response to injury |
| 1374693_at                       | poly (ADP-ribose) polymerase family, member 16               | Parp16          | Upregulated   |    | not in RGU34A                | ---                  | other/unknown function                                                                |
| 1397478_at                       | Prohibitin 2                                                 | Phb2            | Upregulated   |    | U75392_s_at                  | no change            | apoptosis                                                                             |
| 1368259_at                       | prostaglandin-endoperoxide synthase 1                        | Ptgs1           | Upregulated   |    | U03388_s_at                  | not detected         | TGF-beta/BMPs pathway, inflammation/response to injury                                |
| 1367786_at                       | proteasome (prosome, macropain) subunit, beta type 8         | Psmb8           | Upregulated   |    | D10729_s_at                  | no change            | inflammation/response to injury                                                       |
| 1370659_at                       | putative pheromone receptor (Go-VN2)                         | LOC286981       | Downregulated |    | AF016179_at                  | not detected         | other/unknown function                                                                |
| 1392449_at                       | RAD18 homolog (S. cerevisiae) (predicted)                    | Rad18_predicted | Downregulated |    | not in RGU34A                | ---                  | other/unknown function                                                                |
| 1385199_a_at                     | RNA binding motif protein 34                                 | Rbm34           | Upregulated   |    | not in RGU34A                | ---                  | other/unknown function                                                                |
| 1388071_x_at                     | RT1 class Ib, locus Aw2                                      | RT1-Aw2         | Upregulated   |    | M31038_at                    | Upregulated          | inflammation/response to injury                                                       |
| 1388776_at                       | scotin                                                       | MGC94600        | Upregulated   |    | not in RGU34A                | ---                  | apoptosis                                                                             |
| 1381650_at                       | selenophosphate synthetase 1                                 | Sephs1          | Upregulated   |    | not in RGU34A                | ---                  | oxidative stress, apoptosis                                                           |
| 1368224_at                       | Serine (or cysteine) peptidase inhibitor, clade A, member 3N | Serpina3n       | Upregulated   |    | D00753_at                    | Upregulated          | inflammation/response to injury                                                       |
| 1372254_at                       | serine (or cysteine) peptidase inhibitor, clade G, member 1  | Serping1        | Upregulated   |    | rc_AA800318_at               | Upregulated          | inflammation/response to injury                                                       |
| 1371310_s_at                     | serine (or cysteine) proteinase inhibitor, clade H, member 1 | Serpinh1        | Upregulated   |    | M69246_at                    | no change            | TGFbeta/BMPs pathway, matrix and vascular remodeling                                  |
| 1383290_at                       | serine peptidase inhibitor, Kunitz type 1                    | Spint1          | Upregulated   |    | not in RGU34A                | ---                  | matrix and vascular remodeling                                                        |
| 1367725_at                       | serine/threonine-protein kinase pim-3                        | Pim3            | Upregulated   |    | AF086624_s_at                | not detected         | apoptosis                                                                             |
| 1387349_at                       | short stature homeobox 2                                     | Shox2           | Downregulated |    | AJ002259_at<br>AJ002259_g_at | not detected         | other/unknown function                                                                |
| 1370224_at<br>1371781_at         | signal transducer and activator of transcription 3           | Stat3           | Upregulated   |    | rc_A1639141_at<br>X91810_at  | not detected         | inflammation/response to injury                                                       |
| 1372064_at                       | similar to chemokine (C-X-C motif) ligand 16                 | Cxcl16          | Upregulated   |    | not in RGU34A                | ---                  | inflammation/response to injury                                                       |
| 1374904_at                       | sine oculis homeobox homolog 1 (Drosophila)                  | Six1            | Downregulated |    | not in RGU34A                | ---                  | apoptosis                                                                             |
| 1370973_at                       | sodium channel, voltage-gated, type VII, alpha               | Scn7a           | Upregulated   |    | rc_AA925248_at               | Upregulated          | other/unknown function                                                                |
| 1390416_at                       | solute carrier family 25, member 30                          | Slc25a30        | Upregulated   |    | rc_AA892522_at               | no change            | oxidative stress                                                                      |



| GeneChip REA230 2.0 probe set ID | Gene Title                                                                      | Gene Symbol       | Vessels vs C  | DM | GeneChip RGU34A probe set ID       | Müller cells DM vs C | Functional Categories                                |
|----------------------------------|---------------------------------------------------------------------------------|-------------------|---------------|----|------------------------------------|----------------------|------------------------------------------------------|
| 1384831_at                       | solute carrier family 7, (cationic amino acid transporter, y+ system) member 13 | Slc7a13           | Downregulated |    | not in RGU34A                      | ---                  | other/unknown function                               |
| 1396268_at                       | SP110 nuclear body protein                                                      | Sp110             | Upregulated   |    | not in RGU34A                      | ---                  | inflammation/response to injury                      |
| 1371774_at                       | spermidine/spermine N1-acetyl transferase (mapped)                              | Sat               | Upregulated   |    | not in RGU34A                      | ---                  | oxidative stress, apoptosis                          |
| 1378047_at                       | Spi-C transcription factor (Spi-1/PU.1 related) (predicted)                     | Spic_predicted    | Downregulated |    | not in RGU34A                      | ---                  | other/unknown function                               |
| 1392990_at                       | SRY-box containing gene 17 (predicted)                                          | Sox17_predicted   | Upregulated   |    | rc_AA799800_at                     | not detected         | matrix and vascular remodeling                       |
| 1374976_a_at                     | Sterol O-acyltransferase 1                                                      | Soat1             | Upregulated   |    | D86373_s_at                        | not detected         | TGFbeta/BMPs pathway                                 |
| 1382189_at                       | syndecan 2                                                                      | Sdc2              | Upregulated   |    | M81687_at                          | no change            | TGFbeta/BMPs pathway, matrix and vascular remodeling |
| 1374621_at                       | TATA box binding protein (Tbp)-associated factor, RNA polymerase I, C           | Taf1c             | Upregulated   |    | rc_AA892987_at                     | not detected         | other/unknown function                               |
| 1396631_at                       | tetratricopeptide repeat domain 7B (predicted)                                  | Ttc7b_predicted   | Downregulated |    | not in RGU34A                      | ---                  | other/unknown function                               |
| 1371131_a_at                     | Thioredoxin interacting protein                                                 | Txnip             | Upregulated   |    | rc_AI014169_at                     | no change            | TGF-beta/BMPs pathway, oxidative stress, apoptosis   |
| 1367712_at                       | tissue inhibitor of metalloproteinase 1                                         | Timp1             | Upregulated   |    | rc_AI169327_at<br>rc_AI169327_g_at | Upregulated          | TGFbeta/BMPs pathway, matrix and vascular remodeling |
| 1369108_at                       | transformation related protein 63                                               | Trp63             | Downregulated |    | Y10258cds_at                       | not detected         | apoptosis, cell cycle                                |
| 1376636_at                       | transforming growth factor, beta receptor 1                                     | Tgfr1             | Upregulated   |    | L26110_at S81584_s_at              | not detected         | TGFbeta/BMPs pathway                                 |
| 1391374_at                       | transforming, acidic coiled-coil containing protein 3                           | Tacc3             | Downregulated |    | not in RGU34A                      | ---                  | apoptosis, cell cycle                                |
| 1376102_at                       | transmembrane BAX inhibitor motif containing 1                                  | Tmbim1            | Upregulated   |    | not in RGU34A                      | ---                  | matrix and vascular remodeling                       |
| 1371968_at                       | transmembrane BAX inhibitor motif containing 4                                  | Tmbim4            | Upregulated   |    | not in RGU34A                      | ---                  | other/unknown function                               |
| 1382387_at                       | Transmembrane protein 16A (predicted)                                           | Tmem16a_predicted | Upregulated   |    | not in RGU34A                      | ---                  | other/unknown function                               |
| 1370694_at                       | tribbles homolog 3                                                              | Trib3             | Downregulated |    | rc_H31287_at<br>rc_H31287_g_at     | not detected         | apoptosis                                            |
| 1370339_at                       | Tropomyosin 3, gamma                                                            | Tpm3              | Upregulated   |    | S82383_s_at                        | no change            | matrix and vascular remodeling                       |
| 1397221_s_at                     | Tumor necrosis factor receptor superfamily, member 6 (FAS, CD95)                | Tnfrsf6           | Upregulated   |    | D26112_s_at                        | not detected         | apoptosis, inflammation/response to injury           |
| 1396074_at                       | ubiquitin-conjugating enzyme E2I                                                | Ube2i             | Upregulated   |    | U54632_g_at U54632_at              | no change            | TGFbeta/BMPs pathway                                 |
| 1372419_at                       | vaccinia related kinase 3                                                       | Vrk3              | Upregulated   |    | not in RGU34A                      | ---                  | other/unknown function                               |
| 1372564_at                       | v-ets erythroblastosis virus E26 oncogene homolog 2 (avian) (mapped)            | Ets2              | Upregulated   |    | not in RGU34A                      | ---                  | apoptosis                                            |
| 1373938_at                       | WD repeat domain 24                                                             | Wdr24             | Upregulated   |    | not in RGU34A                      | ---                  | other/unknown function                               |
| 1376124_at                       | Wiskott-Aldrich syndrome-like (human)                                           | Wasl              | Upregulated   |    | not in RGU34A                      | ---                  | matrix and vascular remodeling                       |
| 1392677_at                       | Zic family member 4 (predicted)                                                 | Zic4_predicted    | Downregulated |    | not in RGU34A                      | ---                  | other/unknown function                               |
| 1369959_at                       | zinc finger protein 36, C3H type-like 1                                         | Zfp361            | Upregulated   |    | rc_AI136891_at                     | no change            | apoptosis                                            |

To determine whether the effect of diabetes on the gene expression profile of retinal vessels is specific to vascular cells, we compared the list of differentially expressed genes in diabetic retinal vessels with the list of genes differentially expressed in diabetic retinal Müller cells obtained in our previous study (Gerhardinger et al, *Invest. Ophthalmol. Vis. Sci.* 46:349-357). The gene expression profile of diabetic retinal Müller cells was obtained with the Affimetrix GeneChip RGU34A, an earlier and smaller array than the Affimetrix GeneChip REA230 2.0 used in the current study of retinal microvessels. Thus, we first compared the two arrays by probe set ID and by gene title (NetAffx, Affimetrix) to determine which of the genes identified as differentially expressed in diabetic retinal vessels (GeneChip REA230 2.0) were also represented in the GeneChip RGU34A; and then compared the data for the effect of diabetes on retinal vessels vs Müller cells.
